# Supplementary material
Source: Research Square preprint supplement (doi:10.21203/rs.3.rs-8946990/v1)
Supplement: Supplementary file 1 [file 494a2d169572839d1d2d4c36.xlsx]

## Sheet: A - Patient Demand
Notes: Consumption Data Taken from "raw data" sheets
HEALTH CENTRE	Fonko					Shrumo					Belesa					Moristo					Achamo
CONSUMPTION	Amoxicillin dispersible tablets 250 mg (In tablets)	Gentamicin Injection,10 mg/mL	Gentamicin Injection, 20 mg/mL	Ceftriaxone 1g	Total Gentamicin in 10mg/ml equilvalent	Amoxicillin dispersible tablets 250 mg (In tablets)	Gentamicin Injection,10 mg/mL	Gentamicin Injection, 20 mg/mL	Ceftriaxone 1g	Total Gentamicin in 10mg/ml equilvalent	Amoxicillin dispersible tablets 250 mg (In tablets)	Gentamicin Injection,10 mg/mL	Gentamicin Injection, 20 mg/mL	Ceftriaxone 1g	Total Gentamicin in 10mg/ml equilvalent	Amoxicillin dispersible tablets 250 mg (In tablets)	Gentamicin Injection,10 mg/mL	Gentamicin Injection, 20 mg/mL	Ceftriaxone 1g	Total Gentamicin in 10mg/ml equilvalent	Amoxicillin dispersible tablets 250 mg (In tablets)	Gentamicin Injection,10 mg/mL	Gentamicin Injection, 20 mg/mL	Ceftriaxone 1g	Total Gentamicin in 10mg/ml equilvalent
JULY, 2013	1000	70	14	65	98	452	12	20	71	52	600	90	24	90	138	320	100	21	70	142	1500	120	20	42	160
AUGUST, 2013	800	60	10	0	80	476	10	10	110	30	600	108	18	0	144	180	80	19	80	118	1300	140	16	0	172
SEPTEMBER, 2014	1000	73	12	0	97	422	16	14	120	44	0	12	14	190	40	300	69	24	70	117	1000	90	24	0	138
OCTOBER, 2014	800	56	9	0	74	506	10	18	132	46	1000	80	17	240	114	100	50	21	95	92	1200	120	40	140	200
NOVEMBER, 2014	600	80	0	80	80	492	14	10	100	34	950	95	16	270	127	0	30	11	79	52	600	87	25	165	137
DECEMBER, 2014	1400	67	13	105	93	422	12	14	164	40	650	105	21	0	147	210	50	26	0	102	1400	92	16	95	124
JANUARY, 2014	1000	70	16	117	102	520	24	24	127	72	0	70	20	0	110	190	60	18	0	96	900	100	27	0	154
FEBRUARY, 2014	900	69	13	98	95	408	20	16	204	52	1100	0	25	0	50	220	10	20	0	50	500	96	20	185	136
MARCH, 2014	1400	84	18	120	120	514	18	18	170	54	850	105	18	210	141	270	85	17	65	119	1650	95	12	200	119
APRIL, 2014	1200	50	12	95	74	452	16	16	130	48	840	120	19	176	158	230	47	14	70	75	850	110	18	150	146
MAY, 2014	1400	65	10	119	85	540	26	8	156	42	900	115	14	200	143	30	63	5	90	73	1100	130	24	65	178
JUNE, 2014	1300	60	9	128	78	462	16	12	182	40	1250	60	0	230	60	0	60	0	75	60	1600	140	18	0	176
JULY, 2014	800	86	14	134	114		10	19	240	48	860	0	0	184	0	0	45	0	50	45	1300	125	26	0	177
AUGUST, 2014	700	60	15	54	90	460	1	18	190	37	1600	0	20	0	40	200	0	13	0	26	0	55	19	0	93
SEPTEMBER, 2015	1600	54	17	0	88	502	0	20	146	40	1000	90	19	0	128	180	0	16	0	32	1250	90	17	0	124
OCTOBER, 2015	1100	60	10	0	80	372	0	11	284	22	900	65	24	250	113	160	64	20	65	104	960	80	16	0	112
NOVEMBER, 2015	1450	58	3	0	64	534	20	22	160	64	500	79	17	190	113	180	70	18	90	106	790	100	19	0	138
DECEMBER, 2015	1200	60	0	0	60	492	14	18	148	50	900	70	16	200	102	210	56	17	101	90	900	110	20	0	150
JANUARY, 2015	150	50	0	86	50	506	26	24	170	74	1060	84	4	145	92	190	47	20	78	87	1000	100	17	0	134
FEBRUARY, 2015	1500	56	8	104	72	436	16	14	134	44	1000	67	0	235	67	230	63	28	13	119	1140	120	15	0	150
MARCH, 2015	1670	62	12	95	86	408	12	8	158	28	940	80	0	196	80	200	0	25	0	50	1100	75	19	200	113
APRIL, 2015	1330	50	15	110	80	124	8	14	206	36	1200	15	21	34	57	40	0	20	0	40	980	95	21	165	137
MAY, 2015	1400	70	19	55	108	450	12	16	165	44	800	0	30	0	60	0	50	23	0	96	1300	130	24	200	178
JUNE, 2015	1250	76	17	0	110	478	18	16	180	50	600	0	23	235	46	0	50	0	60	50	1500	150	25	35	200
JULY, 2015	350	68	16	0	100	492	20	10	129	40	1300	90		210	90	250	0	25	86	50	1600	170	23	0	216
AUGUST, 2015	1300	80	13	0	106	502	10	18	150	46	1250	120	34	180	188	300	60	26	90	112	980	80	20	0	120
SEPTEMBER, 2016	1460	69	0	0	69	478	14	14	188	42	950	80	26	125	132	280	70	23	74	116	1200	0	16	0	32
OCTOBER, 2016	1100	54	0	0	54	520	20	12	210	44	0	63	18	0	99	230	56	19	80	94	970	0	17	0	34
NOVEMBER, 2016-consumption	1500	59	11	120	81	534	10	14	260	38	900	76	20	0	116	190	58	20	10	98	330	120	20	0	160
DECEMBER, 2016	1280	60	13	115	86	544	16	18	160	52	1100	86	20	0	126	0	53	28	0	109	1200	90	23	0	136
JANUARY, 2016	1440	65	9	97	83	492	8	20	142	48	820	90	19	2024	128	170	80	20	80	120	1000	110	18	168	146
FEBRUARY, 2016	1680	60	14	0	88	502	16	16	200	48	930	95	15	174	125	200	60	25	105	110	890	80	19	200	118
MARCH, 2016	1250	72	3	118	78	436	14	12	149	38	850	90	20	200	130	180	63	20	87	103	110	50	20	180	90
APRIL, 2016	1340	65	0	118	65	520	10	18	160	46	1000	105	23	180	151	210	59	27	18	113	0	120	24	52	168
MAY, 2016	1500	78	16	0	110	548	18	15	250	48	1500	110	27	210	164	250	41	23	100	87	1400	130	30	0	190
JUNE, 2016	1700	83	21	0	125	502	12	25	240	62	1450	45	4	250	53	190	59	24	98	107	1700	135	26	0	187

## Sheet: B - Reorder QTY & Timing
	Amoxicillin dispersible tablets 250 mg (In tablets)	Gentamicin Injection,10 mg/mL	Gentamicin Injection, 20 mg/mL	Ceftriaxone 1g		Amoxicillin dispersible tablets 250 mg (In tablets)	Gentamicin Injection,10 mg/mL	Gentamicin Injection, 20 mg/mL	Ceftriaxone 1g		Amoxicillin dispersible tablets 250 mg (In tablets)	Gentamicin Injection,10 mg/mL	Gentamicin Injection, 20 mg/mL	Ceftriaxone 1g		Amoxicillin dispersible tablets 250 mg (In tablets)	Gentamicin Injection,10 mg/mL	Gentamicin Injection, 20 mg/mL	Ceftriaxone 1g		Amoxicillin dispersible tablets 250 mg (In tablets)	Gentamicin Injection,10 mg/mL	Gentamicin Injection, 20 mg/mL	Ceftriaxone 1g
JULY, 2013	0	0	0	0	Shrumo HC	0	0	0	450	Belesa HC	0	0	0	0	Moristo HC	0	0	0	0	Achamo HC	0	0	0	0
AUGUST, 2013	0	0	0	0	Shrumo HC	0	0	0	91	Belesa HC	0	0	0		Moristo HC	0	0	0	0	Achamo HC	0	0	0	0
SEPTEMBER, 2014	3000	0	0	0	Shrumo HC	0	0	0	0	Belesa HC	0	0	0	700	Moristo HC	400	0	0	100	Achamo HC	2400	300	0	0
OCTOBER, 2014	0	200	0	0	Shrumo HC	0	100	0	0	Belesa HC	2600	350	0	0	Moristo HC	0	100	0	0	Achamo HC	0	0	0	400
NOVEMBER, 2014	0	0	0	400	Shrumo HC	1000	0	0	600	Belesa HC	0	0	100	0	Moristo HC	0	0	0	0	Achamo HC	0	0	0	0
DECEMBER, 2014	2500	0	100	0	Shrumo HC	0	0	0	0	Belesa HC	0	0	0	0	Moristo HC	650	100	100	22	Achamo HC	2800	0	0	0
JANUARY, 2014	0	150	0	0	Shrumo HC	1000	0	0	0	Belesa HC	0	0	0	0	Moristo HC	0	0	0	0	Achamo HC	0	250	0	0
FEBRUARY, 2014	0	0	0	0	Shrumo HC	0	0	0	0	Belesa HC	3000	0	0	0	Moristo HC	0	0	0	0	Achamo HC	0	0	0	600
MARCH, 2014	3500	0	0	650	Shrumo HC	3000	50	100	560	Belesa HC	0	400	0	1080	Moristo HC	500	200	0	150	Achamo HC	4500	300	0	0
APRIL, 2014	0	0	0	0	Shrumo HC	0	0	0	0	Belesa HC	0	0	0	0	Moristo HC	0	0	0	0	Achamo HC	0	0	150	0
MAY, 2014	0	0	0	0	Shrumo HC	0	0	0	1000	Belesa HC	2800	0	0	0	Moristo HC	0	0	0	200	Achamo HC	0	0	0	0
JUNE, 2014	3000	100	50	0	Shrumo HC	0	0	0	0	Belesa HC	0	0	0	0	Moristo HC	30	0	30	0	Achamo HC	2500	300	0	0
JULY, 2014	0	0	0	0	Shrumo HC	0	0	0	0	Belesa HC	0	0	0	0	Moristo HC	0	0	0	0	Achamo HC	0	0	0	0
AUGUST, 2014	0				Shrumo HC	0	0	0	0	Belesa HC	4000	0	100	0	Moristo HC	540	0	100	0	Achamo HC	0	0	0	0
SEPTEMBER, 2015	2500	200	0	0	Shrumo HC	0	0	0	0	Belesa HC	0	300	0	0	Moristo HC	0	0	0	0	Achamo HC	3000	350	0	0
OCTOBER, 2015	0	0	0	0	Shrumo HC	0	0	0	0	Belesa HC	0	0	0	650	Moristo HC	0	200	0	200	Achamo HC	0	0	0	0
NOVEMBER, 2015	2800	0	0	0	Shrumo HC	2500	100	200	400	Belesa HC	0	0	0	0	Moristo HC	650	0	0	0	Achamo HC	0	0	0	0
DECEMBER, 2015	0	150	0	0	Shrumo HC	0	0	0	0	Belesa HC	3500	250	0	600	Moristo HC	0	0	0	150	Achamo HC	4500	300	200	0
JANUARY, 2015	0	0	0	450	Shrumo HC	0	0	0	0	Belesa HC	0	0	0	0	Moristo HC	400	100	100	0	Achamo HC	0	0	0	0
FEBRUARY, 2015	4500	100	100	0	Shrumo HC	0	0	0	750	Belesa HC	0	0	0	0	Moristo HC	0	0	0	0	Achamo HC	0	0	0	0
MARCH, 2015	0	0	0	0	Shrumo HC	0	0	0	0	Belesa HC	3000	0	0	0	Moristo HC	0	0	0	0	Achamo HC	2000	250	0	600
APRIL, 2015	0	0	0	0	Shrumo HC	0	0	0	0	Belesa HC	0	0	2000	0	Moristo HC	0	0	0	0	Achamo HC	0	0	0	0
MAY, 2015	3000	250	0	0	Shrumo HC	3000	1000	0	300	Belesa HC	0	0	0	0	Moristo HC	0	100	0	0	Achamo HC	0	0	0	0
JUNE, 2015	0	0	0	0	Shrumo HC	0	0	0	0	Belesa HC	0	0	0	750	Moristo HC	0	0	0	250	Achamo HC	4000	400	0	0
JULY, 2015	0	0	0	0	Shrumo HC	0	0	0	0	Belesa HC	3500	400	0	0	Moristo HC	700	0	0	0	Achamo HC	0	0	0	0
AUGUST, 2015	4000	300	0	0	Shrumo HC	0	0	0	800	Belesa HC	0	0	0	0	Moristo HC	0	200	0	0	Achamo HC	0	0	0	0
SEPTEMBER, 2016	0	0	0	0	Shrumo HC	0	0	0	0	Belesa HC	0	0	0	0	Moristo HC	450	0	0	150	Achamo HC	2500	0	0	0
OCTOBER, 2016	0	0	0	0	Shrumo HC	0	0	0	0	Belesa HC	0	0	0	0	Moristo HC	0	0	0	0	Achamo HC	0	0	200	0
NOVEMBER, 2016-consumption	5000	100	50	400	Shrumo HC	3050	0	0	0	Belesa HC	4000	300	100	0	Moristo HC	0	100	100	0	Achamo HC	0	450	0	0
DECEMBER, 2016	0	0	0	0	Shrumo HC	0	150	200	500	Belesa HC	0	0	0	0	Moristo HC	0	0	0	0	Achamo HC	3200	0	0	0
JANUARY, 2016	0	0	0	0	Shrumo HC	0	0	0	0	Belesa HC	0	0	0	800	Moristo HC	550	200	0	300	Achamo HC	0	0	0	600
FEBRUARY, 2016	3500	250	0	0	Shrumo HC	0	0	0	0	Belesa HC	0	0	0	0	Moristo HC	0	0	0	0	Achamo HC	0	0	0	0
MARCH, 2016	0	0	0	200	Shrumo HC	0	0	0	0	Belesa HC	2700	350	0	0	Moristo HC	0	0	100	0	Achamo HC	0	0	0	0
APRIL, 2016	0	0	0	0	Shrumo HC	2300	0	0	1200	Belesa HC	0	0	0	0	Moristo HC	650	100	0	0	Achamo HC	0	400	0	0
MAY, 2016	4500	100	50	30	Shrumo HC	0	0	0	0	Belesa HC	3000	0	0	600	Moristo HC	0	0	0	250	Achamo HC	4200	0	0	0
JUNE, 2016	0	0	0	0	Shrumo HC	0	0	0	0	Belesa HC	0	0	0	0	Moristo HC	0	100	0	0	Achamo HC	0	0	0	0
	1194.29	55.8824	10.2941	62.6471	#DIV/0!	452.857	40	14.2857	190.029	#DIV/0!	917.143	67.1429	65.7143	152.353	#DIV/0!	157.714	40	15.1429	50.6286	#DIV/0!	1017.14	94.2857	15.7143	62.8571
	597.143	27.9412	5.14706	31.3235	#DIV/0!	226.429	20	7.14286	95.0143	#DIV/0!	458.571	33.5714	32.8571	76.1765	#DIV/0!	78.8571	20	7.57143	25.3143	#DIV/0!	508.571	47.1429	7.85714	31.4286

## Sheet: C - INVENTORY @ %DAYS IN STOCK
Notes: Standard supply chain calculations to take sheets A and B and C and convert to inventory levels for different demand coverage (i.e. % days in stock).
eg the figure in C15 is given by the desired % Days in stock coverage (A15 or 50%) * by the safety stock level (formula in B10) + half of the reorder point (C8 function of sheets "A" and "B") + Half average quantity (C9 from sheet "B")
	Cells B4-B-9 are the summary stats from sheets A and B and C	Fonko					Shrumo					Belesa					Moristo					Achamo
	Average Demand	1190.28	65.5278	10.6111	59.25	86.75	471.371	13.8611	15.8889	169.028	45.6389					893.056	71.1111		17.3143	189.667	104.778	169.167	50.2222	18.7778	54.9722	87.7778	1033.33	100.972	20.9444	62.2778	142.861
	standard deviation of demand	360.882	9.77095	6.0336	52.8753	17.7551	73.2803	6.12895	4.29326	45.7162	10.6201					363.164	37.0868		8.41689	324.427	42.1789	95.5794	25.1209	7.39035	38.2967	29.6002	430.039	35.105	5.04945	80.0547	39.8164
	average lead time	3	3	3	3	3	3	3	3	3	3					3	3		3	3	3	3	3	3	3	3	3	3	3	3	3
	standard deviation of lead time	1.5	1.5	1.5	1.5	1.5	1.5	1.5	1.5	1.5	1.5					1.5	1.5		1.5	1.5	1.5	1.5	1.5	1.5	1.5	1.5	1.5	1.5	1.5	1.5	1.5
	half of Reorder Point = (average demand * averge lead time / 2)	1785.42	98.2917	15.9167	88.875	130.125	707.057	20.7917	23.8333	253.542	68.4583			0		1339.58	106.667		25.9714	284.5	157.167	253.75	75.3333	28.1667	82.4583	131.667	1550	151.458	31.4167	93.4167	214.292
	half of average order quantity	892.708	49.1458	7.95833	44.4375	65.0625	353.529	10.3958	11.9167	126.771	34.2292			0		669.792	53.3333		12.9857	142.25	78.5833	126.875	37.6667	14.0833	41.2292	65.8333	775	75.7292	15.7083	46.7083	107.146
	Safety Stock = %DIS x √[(LTavg x σD^2) + (σLT x Davg)^2] where LT is average lead time, σD is standard deviation of demand, σLT is standard deviation of lead time, and Davg is average Demand)
		AVERAGE INVENTORY LEVELS AT DIFFERENCT DEMAND COVERAGE FOR EACH DRUG
		Fonko					Shrumo					Belesa					Moristo					Achamo
		Amoxicillin dispersible tablets 250 mg (In tablets)	Gentamicin Injection,10 mg/mL	Gentamicin Injection, 20 mg/mL	Ceftriaxone 1g	Total Gentamicin in 10mg/ml equilvalent	Amoxicillin dispersible tablets 250 mg (In tablets)	Gentamicin Injection,10 mg/mL	Gentamicin Injection, 20 mg/mL	Ceftriaxone 1g	Total Gentamicin in 10mg/ml equilvalent	Amoxicillin dispersible tablets 250 mg (In tablets)	Gentamicin Injection,10 mg/mL	Gentamicin Injection, 20 mg/mL	Ceftriaxone 1g	Total Gentamicin in 10mg/ml equilvalent	Amoxicillin dispersible tablets 250 mg (In tablets)	Gentamicin Injection,10 mg/mL	Gentamicin Injection, 20 mg/mL	Ceftriaxone 1g	Total Gentamicin in 10mg/ml equilvalent	Amoxicillin dispersible tablets 250 mg (In tablets)	Gentamicin Injection,10 mg/mL	Gentamicin Injection, 20 mg/mL	Ceftriaxone 1g	Total Gentamicin in 10mg/ml equilvalent	2325	227.188	47.125	140.125	321.438
% days in stock	Z statistic	I																							126.34	201.042	2368.11	231.279	47.9425	144.316	327.081
0.5	0	2678.12	147.438	23.875	133.312	195.188	1060.59	31.1875	35.75	380.312	102.688			0		2009.38	160		38.9571	426.75	235.75	380.625	113	42.25	128.995	204.587	2411.25	235.373	48.7606	148.51	332.728
0.51	0.0250689	2725.55	149.938	24.3523	136.512	198.539	1078.59	31.7727	36.3759	386.971	104.465			0		2046.47	163.121		39.7038	442.539	240.095	388.22	115.181	43.0256	131.653	208.135	2454.44	239.472	49.5796	152.709	338.382
0.52	0.0501536	2773	152.44	24.83	139.713	201.894	1096.61	32.3583	37.0022	393.634	106.243			0		2083.6	166.245		40.4509	458.339	244.442	395.82	117.363	43.8017	134.316	211.691	2497.71	243.579	50.4003	156.917	344.047
0.53	0.0752699	2820.51	154.945	25.3082	142.918	205.252	1114.66	32.9447	37.6292	400.306	108.023			0		2120.77	169.372		41.1989	474.158	248.795	403.43	119.548	44.5788	136.986	215.255	2541.1	247.696	51.223	161.134	349.726
0.54	0.100434	2868.11	157.455	25.7873	146.13	208.616	1132.73	33.5321	38.2575	406.99	109.807			0		2158.01	172.506		41.9484	490.007	253.157	411.054	121.737	45.3573	139.664	218.831	2584.62	251.827	52.0483	165.366	355.423
0.55	0.125661	2915.83	159.971	26.2677	149.349	211.99	1150.86	34.1211	38.8873	413.691	111.595			0		2195.34	175.647		42.6998	505.897	257.529	418.698	123.932	46.1378	142.353	222.421	2628.31	255.973	52.8768	169.613	361.142
0.56	0.150969	2963.71	162.495	26.7496	152.579	215.374	1169.04	34.7119	39.5192	420.413	113.389			0		2232.8	178.798		43.4535	521.837	261.915	426.365	126.134	46.9208	145.053	226.027	2672.19	260.138	53.709	173.88	366.887
0.57	0.176374	3011.77	165.029	27.2333	155.821	218.77	1187.29	35.3049	40.1534	427.161	115.19			0		2270.39	181.961		44.2102	537.838	266.319	434.062	128.344	47.7068	147.768	229.651	2716.3	264.325	54.5455	178.169	372.661
0.58	0.201893	3060.04	167.574	27.7192	159.078	222.183	1205.62	35.9007	40.7906	433.939	116.999			0		2308.16	185.139		44.9702	553.911	270.741	441.794	130.564	48.4964	150.498	233.297	2760.68	268.536	55.387	182.482	378.47
0.59	0.227545	3108.57	170.132	28.2076	162.351	225.612	1224.04	36.4995	41.431	440.753	118.817			0		2346.12	188.333		45.7342	570.067	275.187	449.566	132.795	49.29	153.247	236.967	2805.34	272.774	56.234	186.825	384.317
0.6	0.253347	3157.37	172.706	28.6989	165.644	229.062	1242.58	37.1019	42.0752	447.606	120.646			0		2384.31	191.546		46.5027	586.318	279.659	457.383	135.04	50.0883	156.016	240.663	2850.33	277.044	57.0871	191.199	390.206
0.61	0.279319	3206.5	175.296	29.1935	168.958	232.535	1261.24	37.7082	42.7236	454.505	122.487			0		2422.74	194.78		47.2762	602.677	284.161	465.252	137.3	50.8918	158.806	244.39	2895.68	281.348	57.9472	195.608	396.143
0.62	0.305481	3255.99	177.906	29.6916	172.297	236.033	1280.03	38.3189	43.3768	461.454	124.342			0		2461.46	198.037		48.0554	619.154	288.695	473.179	139.576	51.7012	161.622	248.149	2941.43	285.691	58.8148	200.056	402.132
0.63	0.331853	3305.88	180.536	30.1938	175.663	239.559	1298.98	38.9346	44.0352	468.459	126.211			0		2500.49	201.321		48.8408	635.765	293.266	481.169	141.87	52.5172	164.465	251.944	2987.63	290.075	59.6908	204.547	408.179
0.64	0.358459	3356.21	183.189	30.7004	179.058	243.117	1318.09	39.5557	44.6994	475.526	128.097			0		2539.86	204.634		49.6332	652.522	297.877	489.23	144.184	53.3403	167.337	255.779	3034.3	294.505	60.576	209.085	414.289
0.65	0.38532	3407.02	185.869	31.2118	182.486	246.709	1337.38	40.1828	45.3701	482.661	130.002			0		2579.62	207.978		50.4333	669.441	302.532	497.368	146.521	54.1714	170.242	259.658	3081.51	298.985	61.4711	213.675	420.469
0.66	0.412463	3458.37	188.576	31.7286	185.95	250.338	1356.88	40.8164	46.0477	489.87	131.926			0		2619.79	211.358		51.2417	686.536	307.237	505.592	148.883	55.0111	173.183	263.584	3129.29	303.519	62.3773	218.32	426.724
0.67	0.439913	3510.3	191.314	32.2513	189.453	254.008	1376.6	41.4572	46.7331	497.162	133.871			0		2660.41	214.776		52.0592	703.825	311.994	513.909	151.271	55.8604	176.162	267.562	3177.7	308.114	63.2953	223.027	433.061
0.68	0.467699	3562.86	194.085	32.7804	192.999	257.723	1396.56	42.1059	47.4268	504.542	135.841			0		2701.53	218.236		52.8868	721.326	316.81	522.327	153.688	56.7201	179.183	271.596	3226.8	312.774	64.2264	227.8	439.488
0.69	0.49585	3616.11	196.893	33.3164	196.592	261.487	1416.78	42.7631	48.1296	512.02	137.837			0		2743.19	221.741		53.7252	739.057	321.689	530.856	156.137	57.591	182.25	275.691	3276.64	317.504	65.1716	232.646	446.013
0.7	0.524401	3670.12	199.74	33.86	200.235	265.305	1437.29	43.4296	48.8424	519.603	139.86			0		2785.44	225.296		54.5755	757.039	326.637	539.507	158.621	58.4744	185.368	279.853	3327.3	322.312	66.1322	237.571	452.644
0.71	0.553385	3724.95	202.631	34.4119	203.934	269.18	1458.11	44.1062	49.5661	527.302	141.915			0		2828.34	228.905		55.4388	775.294	331.661	548.288	161.142	59.3711	188.539	284.088	3378.84	327.203	67.1096	242.582	459.391
0.72	0.582842	3780.67	205.569	34.9728	207.693	273.119	1479.28	44.7939	50.3015	535.126	144.003			0		2871.93	232.573		56.3161	793.847	336.766	557.213	163.705	60.2825	191.771	288.402	3431.35	332.186	68.1053	247.687	466.264
0.73	0.612813	3837.37	208.558	35.5435	211.518	277.126	1500.81	45.4936	51.0498	543.087	146.128			0		2916.29	236.305		57.2088	812.725	341.96	566.293	166.312	61.2097	195.067	292.803	3484.91	337.269	69.121	252.894	473.276
0.74	0.643345	3895.12	211.603	36.1248	215.414	281.209	1522.74	46.2064	51.8121	551.197	148.292			0		2961.47	240.106		58.1181	831.955	347.252	575.544	168.968	62.1544	198.433	297.298	3539.61	342.461	70.1585	258.213	480.437
0.75	0.67449	3954.04	214.71	36.7178	219.389	285.373	1545.11	46.9334	52.5896	559.47	150.5			0		3007.56	243.984		59.0457	851.571	352.65	584.98	171.678	63.1179	201.877	301.896	3595.58	347.773	71.2198	263.654	487.763
0.76	0.706303	4014.22	217.883	37.3236	223.449	289.627	1567.96	47.6761	53.3839	567.92	152.755			0		3054.64	247.946		59.9932	871.608	358.164	594.619	174.445	64.1022	205.406	306.608	3652.93	353.215	72.3072	269.229	495.27
0.77	0.738847	4075.78	221.129	37.9433	227.602	293.978	1591.34	48.4358	54.1964	576.564	155.062			0		3102.81	251.998		60.9625	892.106	363.804	604.479	177.277	65.1091	209.028	311.444	3711.79	358.802	73.4235	274.952	502.975
0.78	0.772193	4138.86	224.454	38.5782	231.858	298.437	1615.3	49.2143	55.0289	585.421	157.426			0		3152.15	256.15		61.9556	913.109	369.584	614.582	180.178	66.1408	212.754	316.418	3772.32	364.546	74.5714	280.837	510.899
0.79	0.806421	4203.61	227.868	39.2299	236.226	303.014	1639.89	50.0133	55.8835	594.513	159.852			0		3202.81	260.412		62.9751	934.667	375.516	624.952	183.155	67.1998	216.592	321.543	3834.7	370.467	75.7544	286.902	519.065
0.8	0.841621	4270.2	231.379	39.9002	240.718	307.72	1665.17	50.8351	56.7623	603.863	162.347			0		3254.9	264.795		64.0234	956.837	381.617	635.617	186.218	68.2888	220.558	326.838	3899.14	376.582	76.9763	293.166	527.5
0.81	0.877896	4338.82	234.997	40.5909	245.347	312.571	1691.23	51.6819	57.668	613.498	164.919			0		3308.59	269.312		65.1038	979.685	387.904	646.608	189.373	69.4111	224.664	332.32	3965.86	382.914	78.2416	299.653	536.235
0.82	0.915365	4409.69	238.734	41.3043	250.129	317.581	1718.15	52.5566	58.6034	623.451	167.575			0		3364.04	273.977		66.2198	1003.28	394.398	657.96	192.633	70.5704	228.928	338.013	4035.15	389.491	79.5556	306.39	545.305
0.83	0.954165	4483.09	242.604	42.0431	255.08	322.769	1746.02	53.4624	59.5721	633.757	170.325			0		3421.46	278.808		67.3754	1027.72	401.122	669.716	196.009	71.7708	233.37	343.944	4107.33	396.341	80.9245	313.408	554.755
0.84	0.994458	4559.31	246.623	42.8103	260.222	328.156	1774.96	54.403	60.5781	644.459	173.181			0		3481.09	283.825		68.5754	1053.1	408.106	681.923	199.514	73.0174	238.014	350.145	4182.8	403.504	82.3556	320.745	564.634
0.85	1.03643	4638.72	250.809	43.6096	265.579	333.769	1805.12	55.383	61.6261	655.609	176.157			0		3543.21	289.052		69.8256	1079.54	415.381	694.641	203.166	74.3161	242.89	356.655	4262.03	411.023	83.8581	328.448	575.005
0.86	1.08032	4721.73	255.186	44.4452	271.18	339.637	1836.64	56.4075	62.7217	667.266	179.268			0		3608.16	294.516		71.1327	1107.18	422.987	707.937	206.983	75.6738	248.032	363.521	4345.6	418.954	85.4429	336.573	585.945
0.87	1.12639	4808.89	259.781	45.3224	277.059	345.797	1869.74	57.483	63.872	679.503	182.533			0		3676.34	300.253		72.5048	1136.2	430.972	721.896	210.991	77.0993	253.487	370.804	4434.24	427.366	87.1237	345.19	597.548
0.88	1.17499	4900.81	264.628	46.2477	283.261	352.294	1904.65	58.6175	65.0853	692.411	185.978			0		3748.26	306.304		73.9522	1166.8	439.394	736.619	215.219	78.6028	259.31	378.578	4528.86	436.346	88.9181	354.389	609.934
0.89	1.22653	4998.31	269.769	47.2291	289.839	359.186	1941.67	59.8207	66.3721	706.101	189.632			0		3824.53	312.722		75.4872	1199.27	448.327	752.235	219.703	80.1974	265.575	386.944	4630.67	446.009	90.8488	364.288	623.262
0.9	1.28155	5102.4	275.257	48.2768	296.861	366.543	1981.2	61.1052	67.7458	720.717	193.532			0		3905.96	319.573		77.126	1233.92	457.864	768.906	224.49	81.8997	272.382	396.031	4741.27	456.506	92.9462	375.041	637.741
0.91	1.34076	5214.39	281.162	49.4041	304.416	374.459	2023.73	62.4873	69.2239	736.442	197.729			0		3993.58	326.945		78.8893	1271.21	468.125	786.843	229.64	83.7314	279.866	406.024	4862.89	468.048	95.2525	386.864	653.661
0.92	1.40507	5336.06	287.577	50.6287	312.624	383.059	2069.93	63.9888	70.8297	753.526	202.288			0		4088.76	334.953		80.8049	1311.72	479.272	806.33	235.236	85.7213	288.224	417.184	4998.71	480.938	97.8282	400.07	671.441
0.93	1.47579	5469.84	294.63	51.9753	321.649	392.515	2120.73	65.6397	72.5953	772.31	207.301			0		4193.42	343.759		82.9111	1356.26	491.529	827.756	241.388	87.9093	297.757	429.912	5153.62	495.64	100.766	415.13	691.719
0.94	1.55477	5619.25	302.507	53.4792	331.728	403.076	2177.47	67.4836	74.5672	793.289	212.9			0		4310.31	353.593		85.2635	1406.01	505.218	851.686	248.259	90.3529	308.957	444.865	5335.62	512.913	104.217	432.825	715.544
0.95	1.64485	5789.65	311.492	55.1944	343.224	415.12	2242.18	69.5865	76.8162	817.216	219.285			0		4443.62	364.81		87.9464	1462.75	520.83	878.978	256.096	93.1399	322.726	463.249	5559.36	534.147	108.46	454.577	744.833
0.96	1.75069	5989.85	322.047	57.2095	356.73	429.271	2318.21	72.0571	79.4584	845.327	226.788			0		4600.24	377.987		91.0984	1529.4	539.172	911.043	265.303	96.4142	341.029	487.687	5856.79	562.375	114.1	483.494	783.768
0.97	1.88079	6235.97	335.024	59.6869	373.334	446.668	2411.67	75.0945	82.7068	879.886	236.01			0		4792.79	394.188		94.9735	1611.35	561.722	950.463	276.621	100.44	369.877	526.204	6325.57	606.865	122.99	529.07	845.134
0.98	2.05375	6563.14	352.274	62.9801	395.406	469.793	2535.91	79.1321	87.0248	925.827	248.271			0		5048.75	415.723		100.125	1720.29	591.698	1002.86	291.668	105.791
0.99	2.32635	7078.81	379.463	68.1706	430.195	506.242	2731.74	85.4959	93.8307	998.234	267.594			0		5452.17	449.666		108.244	1891.98	638.944	1085.46	315.383	114.225

## Sheet: D -RESULTS - COST EFFECTIVENESS
Cost Effectiveness Calculations by Clinc and Drug
	Fonko Amoxicillin											Fonko Gentamycin											Fonko Ceftriaxone												Total Costs for All Drugs per Life Saved
Level of Demand Coverage %	Average Inventory (250mg Tablets)	% extra inventory	Cost of Inventory (varied by sensitity in Sheet E cell C2)	Storage Cost (varied by sensitity in Sheet E cell C5)	Days in Stock	Average Daily Consumption * Days in Stock	Treatments provided this demand coverage	Expected untreated mortality% (varied by sensitity in Sheet E cell C8)	Avoided Mortaility with Treatment (varied by sensitity in Sheet E cell C9)	Cost per Life saved	repeat with relative references																								total cost all drugs	lives saved (assumes for those beginning 1st line treatment, but all 2nd line drugs also needed)	cost per life saved. Mid and worst recalculated according to the sentstivity analysis
	from sheet XX	*bx-(bx-1)	ColB * sheet E cell C2	ColD*sheeet E cellC5	colA*365	SheetA (all month average for each drug and clinic)	ColG/ Standard treatment guidelines	ColG*sheet E Cell C8	Col G * sheet E Cell C9	ColE/ColJ	repeat with relative references																								ColE+ColP+ColAA	ColJ	ColAJ/ColAK
80	4270.2	1	341.616	85.4039	292	11963.2	598.162	29.9081	9.86967	8.65317	80	307.72	1	43.0808	10.7702	292	8777.52	23.4067	1.17034	0.386211	27.8869	80	240.718	1	240.718	60.1795		292	981.12	1.96224	0.098112	0.032377		80	156.354	9.86967	15.8418
81	4338.82	1.01607	347.105	86.7763	295.65	12112.8	605.639	30.282	9.99304	8.68367	81	312.571	1.01576	43.7599	10.94	295.65	8887.24	23.6993	1.18497	0.391039	27.9767	81	245.347	1.01923	245.347	61.3368		295.65	993.384	1.98677	0.0993384	0.0651586		81	159.053	9.99304	15.9164
82	4409.69	1.03267	352.776	88.1939	299.3	12262.3	613.116	30.6558	10.1164	8.7179	82	317.581	1.03204	44.4613	11.1153	299.3	8996.96	23.9919	1.19959	0.786905	14.1254	82	250.129	1.0391	250.129	62.5322		299.3	1005.65	2.0113	0.100565	0.098345		82	161.841	10.1164	15.9979
83	4483.09	1.04986	358.647	89.6618	302.95	12411.9	620.593	31.0297	10.2398	8.75622	83	322.769	1.0489	45.1876	11.2969	302.95	9106.68	24.2845	1.21422	1.1876	9.51239	83	255.08	1.05967	255.08	63.7701		302.95	1017.91	2.03582	0.101791	0.131936		83	164.729	10.2398	16.0871
84	4559.31	1.06771	364.745	91.1863	306.6	12561.4	628.07	31.4035	10.3632	8.79908	84	328.156	1.06641	45.9418	11.4855	306.6	9216.4	24.5771	1.22885	1.59312	7.20941	84	260.222	1.08103	260.222	65.0556		306.6	1030.18	2.06035	0.103018	0.165932		84	167.727	10.3632	16.185
85	4638.72	1.0863	371.097	92.7743	310.25	12710.9	635.547	31.7774	10.4865	8.847	85	333.769	1.08465	46.7276	11.6819	310.25	9326.11	24.8696	1.24348	2.00347	5.83084	85	265.579	1.10328	265.579	66.3948		310.25	1042.44	2.08488	0.104244	0.200332		85	170.851	10.4865	16.2924
86	4721.73	1.10574	377.739	94.4347	313.9	12860.5	643.024	32.1512	10.6099	8.90062	86	339.637	1.10372	47.5491	11.8873	313.9	9435.83	25.1622	1.25811	2.41865	4.91485	86	271.18	1.12655	271.18	67.795		313.9	1054.7	2.10941	0.10547	0.235138		86	174.117	10.6099	16.4108
87	4808.89	1.12615	384.711	96.1777	317.55	13010	650.501	32.5251	10.7333	8.96071	87	345.797	1.12374	48.4115	12.1029	317.55	9545.55	25.4548	1.27274	2.83865	4.26361	87	277.059	1.15097	277.059	69.2649		317.55	1066.97	2.13394	0.106697	0.270348		87	177.545	10.7333	16.5416
88	4900.81	1.14768	392.065	98.0163	321.2	13159.6	657.978	32.8989	10.8566	9.02823	88	352.294	1.14485	49.3212	12.3303	321.2	9655.27	25.7474	1.28737	3.26348	3.77827	88	283.261	1.17673	283.261	70.8153		321.2	1079.23	2.15846	0.107923	0.305962		88	181.162	10.8566	16.6867
89	4998.31	1.17051	399.865	99.9663	324.85	13309.1	665.455	33.2728	10.98	9.10439	89	359.186	1.16725	50.286	12.5715	324.85	9764.99	26.04	1.302	3.69314	3.40402	89	289.839	1.20406	289.839	72.4597		324.85	1091.5	2.18299	0.10915	0.341982		89	184.997	10.98	16.8486
90	5102.4	1.19489	408.192	102.048	328.5	13458.6	672.932	33.6466	11.1034	9.19071	90	366.543	1.19116	51.316	12.829	328.5	9874.71	26.3326	1.31663	4.12763	3.10808	90	296.861	1.23323	296.861	74.2151		328.5	1103.76	2.20752	0.110376	0.378406		90	189.092	11.1034	17.0301
91	5214.39	1.22111	417.151	104.288	332.15	13608.2	680.409	34.0205	11.2268	9.28923	91	374.459	1.21688	52.4243	13.1061	332.15	9984.43	26.6251	1.33126	4.56694	2.86977	91	304.416	1.26462	304.416	76.104		332.15	1116.02	2.23205	0.111602	0.415235		91	193.498	11.2268	17.2354
92	5336.06	1.24961	426.885	106.721	335.8	13757.7	687.886	34.3943	11.3501	9.40264	92	383.059	1.24483	53.6283	13.4071	335.8	10094.1	26.9177	1.34589	5.01109	2.67548	92	312.624	1.29871	312.624	78.156		335.8	1128.29	2.25658	0.112829	0.452468		92	198.284	11.3501	17.4698
93	5469.84	1.28093	437.587	109.397	339.45	13907.3	695.363	34.7682	11.4735	9.53474	93	392.515	1.27556	54.9521	13.738	339.45	10203.9	27.2103	1.36052	5.46006	2.51609	93	321.649	1.33621	321.649	80.4122		339.45	1140.55	2.2811	0.114055	0.490106		93	203.547	11.4735	17.7406
94	5619.25	1.31592	449.54	112.385	343.1	14056.8	702.84	35.142	11.5969	9.69097	94	403.076	1.30988	56.4306	14.1076	343.1	10313.6	27.5029	1.37514	5.91385	2.38552	94	331.728	1.37808	331.728	82.9321		343.1	1152.82	2.30563	0.115282	0.528149		94	209.425	11.5969	18.0587
95	5789.65	1.35583	463.172	115.793	346.75	14206.3	710.317	35.5159	11.7202	9.87975	95	415.12	1.34902	58.1168	14.5292	346.75	10423.3	27.7955	1.38977	6.37248	2.27999	95	343.224	1.42584	343.224	85.806		346.75	1165.08	2.33016	0.116508	0.566597		95	216.128	11.7202	18.4406
96	5989.85	1.40271	479.188	119.797	350.4	14355.9	717.794	35.8897	11.8436	10.1149	96	429.271	1.395	60.0979	15.0245	350.4	10533	28.0881	1.4044	6.83593	2.19787	96	356.73	1.48194	356.73	89.1826		350.4	1177.34	2.35469	0.117734	0.605449		96	224.004	11.8436	18.9135
97	6235.97	1.46035	498.877	124.719	354.05	14505.4	725.271	36.2636	11.967	10.422	97	446.668	1.45154	62.5335	15.6334	354.05	10642.7	28.3806	1.41903	7.30421	2.14032	97	373.334	1.55092	373.334	93.3336		354.05	1189.61	2.37922	0.118961	0.644706		97	233.686	11.967	19.5276
98	6563.14	1.53697	525.051	131.263	357.7	14655	732.748	36.6374	12.0903	10.8568	98	469.793	1.52669	65.7711	16.4428	357.7	10752.5	28.6732	1.43366	7.77732	2.11419	98	395.406	1.64261	395.406	98.8516		357.7	1201.87	2.40374	0.120187	0.684368		98	246.557	12.0903	20.3929
99	7078.81	1.65773	566.305	141.576	361.35	14804.5	740.225	37.0113	12.2137	11.5916	99	506.242	1.64514	70.8739	17.7185	361.35	10862.2	28.9658	1.44829	8.25526	2.14633	99	430.195	1.78713	430.195	107.549		361.35	1214.14	2.42827	0.121414	0.724434		99	266.843	12.2137	21.8478
Schrumo Amoxicillin											Schrumo Gentamycin											Schrumo Ceftriaxone												Total Costs for All Drugs per Life Saved
80	1665.17	1	133.214	33.3034	876.8	13564.1	678.205	33.9102	11.1904	2.97608	80	162.347	1	22.7286	5.68215	292	4555.2	12.1472	0.60736	0.200429	28.35	80	603.863	1	603.863	150.966		292	1620.6	3.2412	0.16206	0.0534798		80	189.951	11.1904	16.9745
81	1691.23	1.01565	135.298	33.8246	887.76	13733.6	686.682	34.3341	11.3303	2.98533	81	164.919	1.01584	23.0886	5.77215	295.65	4612.14	12.299	0.614952	0.202934	28.4435	81	613.498	1.01596	613.498	153.375		295.65	1640.86	3.28172	0.164086	0.107628		81	192.971	11.3303	17.0315
82	1718.15	1.03181	137.452	34.3629	898.72	13903.2	695.16	34.758	11.4701	2.99586	82	167.575	1.0322	23.4604	5.86511	299.3	4669.08	12.4509	0.622544	0.20544	28.5491	82	623.451	1.03244	623.451	155.863		299.3	1661.11	3.32223	0.166111	0.162445		82	196.091	11.4701	17.0958
83	1746.02	1.04855	139.682	34.9204	909.68	14072.7	703.637	35.1819	11.61	3.00778	83	170.325	1.04914	23.8455	5.96137	302.95	4726.02	12.6027	0.630136	0.207945	28.6681	83	633.757	1.0495	633.757	158.439		302.95	1681.37	3.36274	0.168137	0.21793		83	199.321	11.61	17.168
84	1774.96	1.06593	141.997	35.4993	920.64	14242.3	712.115	35.6058	11.7499	3.02124	84	173.181	1.06673	24.2454	6.06134	306.6	4782.96	12.7546	0.637728	0.21045	28.8018	84	644.459	1.06723	644.459	161.115		306.6	1701.63	3.40326	0.170163	0.274084		84	202.675	11.7499	17.2491
85	1805.12	1.08404	144.409	36.1023	931.6	14411.9	720.593	36.0296	11.8898	3.03642	85	176.157	1.08506	24.6619	6.16548	310.25	4839.9	12.9064	0.64532	0.212956	28.952	85	655.609	1.08569	655.609	163.902		310.25	1721.89	3.44378	0.172189	0.330906		85	206.17	11.8898	17.3401
86	1836.64	1.10297	146.931	36.7329	942.56	14581.4	729.07	36.4535	12.0297	3.05352	86	179.268	1.10422	25.0975	6.27437	313.9	4896.84	13.0582	0.652912	0.215461	29.1207	86	667.266	1.105	667.266	166.816		313.9	1742.14	3.48429	0.174214	0.388397		86	209.824	12.0297	17.4422
87	1869.74	1.12285	149.579	37.3948	953.52	14751	737.548	36.8774	12.1695	3.07282	87	182.533	1.12434	25.5547	6.38867	317.55	4953.78	13.2101	0.660504	0.217966	29.3104	87	679.503	1.12526	679.503	169.876		317.55	1762.4	3.5248	0.17624	0.446556		87	213.659	12.1695	17.5569
88	1904.65	1.14381	152.372	38.093	964.48	14920.5	746.025	37.3013	12.3094	3.09462	88	185.978	1.14556	26.037	6.50924	321.2	5010.72	13.3619	0.668096	0.220472	29.5241	88	692.411	1.14664	692.411	173.103		321.2	1782.66	3.56532	0.178266	0.505384		88	217.705	12.3094	17.686
89	1941.67	1.16605	155.334	38.8335	975.44	15090.1	754.503	37.7251	12.4493	3.11933	89	189.632	1.16806	26.5485	6.63711	324.85	5067.66	13.5138	0.675688	0.222977	29.7659	89	706.101	1.16931	706.101	176.525		324.85	1802.92	3.60583	0.180292	0.56488		89	221.996	12.4493	17.832
90	1981.2	1.18979	158.496	39.624	986.4	15259.6	762.98	38.149	12.5892	3.14747	90	193.532	1.19209	27.0945	6.77363	328.5	5124.6	13.6656	0.68328	0.225482	30.0406	90	720.717	1.19351	720.717	180.179		328.5	1823.17	3.64635	0.182318	0.625045		90	226.577	12.5892	17.9977
91	2023.73	1.21533	161.898	40.4746	997.36	15429.2	771.458	38.5729	12.7291	3.1797	91	197.729	1.21794	27.6821	6.92051	332.15	5181.54	13.8174	0.690872	0.227988	30.3548	91	736.442	1.21955	736.442	184.111		332.15	1843.43	3.68687	0.184343	0.685878		91	231.506	12.7291	18.1872
92	2069.93	1.24307	165.595	41.3986	1008.32	15598.7	779.936	38.9968	12.8689	3.21694	92	202.288	1.24602	28.3203	7.08009	335.8	5238.48	13.9693	0.698464	0.230493	30.7171	92	753.526	1.24784	753.526	188.381		335.8	1863.69	3.72738	0.186369	0.74738		92	236.86	12.8689	18.4056
93	2120.73	1.27358	169.659	42.4147	1019.28	15768.3	788.413	39.4207	13.0088	3.26046	93	207.301	1.2769	29.0222	7.25554	339.45	5295.42	14.1211	0.706056	0.232998	31.1399	93	772.31	1.27895	772.31	193.078		339.45	1883.95	3.7679	0.188395	0.80955		93	242.748	13.0088	18.6603
94	2177.47	1.30766	174.198	43.5494	1030.24	15937.8	796.891	39.8445	13.1487	3.31207	94	212.9	1.31139	29.806	7.4515	343.1	5352.36	14.273	0.713648	0.235504	31.6407	94	793.289	1.31369	793.289	198.322		343.1	1904.2	3.80841	0.19042	0.872389		94	249.323	13.1487	18.9618
95	2242.18	1.34652	179.375	44.8436	1041.2	16107.4	805.368	40.2684	13.2886	3.3746	95	219.285	1.35072	30.7	7.67499	346.75	5409.3	14.4248	0.72124	0.238009	32.2466	95	817.216	1.35331	817.216	204.304		346.75	1924.46	3.84892	0.192446	0.935897		95	256.823	13.2886	19.3266
96	2318.21	1.39217	185.457	46.3641	1052.16	16276.9	813.846	40.6923	13.4285	3.45268	96	226.788	1.39693	31.7503	7.93757	350.4	5466.24	14.5766	0.728832	0.240515	33.0024	96	845.327	1.39987	845.327	211.332		350.4	1944.72	3.88944	0.194472	1.00007		96	265.634	13.4285	19.7814
97	2411.67	1.4483	192.934	48.2334	1063.12	16446.5	822.323	41.1162	13.5683	3.55485	97	236.01	1.45374	33.0415	8.26037	354.05	5523.18	14.7285	0.736424	0.24302	33.9905	97	879.886	1.4571	879.886	219.972		354.05	1964.98	3.92996	0.196498	1.06492		97	276.465	13.5683	20.3758
98	2535.91	1.52291	202.873	50.7183	1074.08	16616	830.801	41.54	13.7082	3.69985	98	248.271	1.52926	34.7579	8.68947	357.7	5580.12	14.8803	0.744016	0.245525	35.3914	98	925.827	1.53317	925.827	231.457		357.7	1985.23	3.97047	0.198523	1.13043		98	290.864	13.7082	21.2183
99	2731.74	1.64051	218.539	54.6348	1085.04	16785.6	839.278	41.9639	13.8481	3.94529	99	267.594	1.64828	37.4632	9.3658	361.35	5637.06	15.0322	0.751608	0.248031	37.7607	99	998.234	1.65308	998.234	249.558		361.35	2005.49	4.01098	0.200549	1.19661	0	99	313.559	13.8481	22.6428
Belesa Amoxicillin											Belesa Gentamycin											Belesa Ceftriaxone												Total Costs for All Drugs per Life Saved
80	3254.9	1	260.392	65.0981	876.8	29916.4	1495.82	74.791	24.681	2.63757	80	381.617	1	53.4263	13.3566	292	12468.4	33.2491	1.66245	0.54861	24.3462	80	956.837	1	956.837	239.209		292	2657.2	5.3144	0.26572	0.0876876		80	317.664	24.681	12.8708
81	3308.59	1.01649	264.687	66.1717	887.76	30290.4	1514.52	75.7259	24.9896	2.64798	81	387.904	1.01647	54.3065	13.5766	295.65	12624.3	33.6647	1.68323	0.555467	24.4418	81	979.685	1.02388	979.685	244.921		295.65	2690.42	5.38083	0.269042	0.176471		81	324.67	24.9896	12.9922
82	3364.04	1.03353	269.123	67.2807	898.72	30664.3	1533.22	76.6608	25.2981	2.65952	82	394.398	1.03349	55.2157	13.8039	299.3	12780.1	34.0803	1.70401	0.562325	24.5479	82	1003.28	1.04854	1003.28	250.821		299.3	2723.63	5.44726	0.272363	0.266351		82	331.906	25.2981	13.1198
83	3421.46	1.05117	273.717	68.4292	909.68	31038.3	1551.91	77.5957	25.6066	2.67233	83	401.122	1.05111	56.1571	14.0393	302.95	12936	34.4959	1.7248	0.569182	24.6657	83	1027.72	1.07408	1027.72	256.931		302.95	2756.84	5.51369	0.275684	0.357327		83	339.399	25.6066	13.2544
84	3481.09	1.06949	278.487	69.6218	920.64	31412.2	1570.61	78.5306	25.9151	2.68653	84	408.106	1.06941	57.1348	14.2837	306.6	13091.8	34.9115	1.74558	0.57604	24.7964	84	1053.1	1.10061	1053.1	263.275		306.6	2790.06	5.58012	0.279006	0.449399		84	347.181	25.9151	13.3968
85	3543.21	1.08858	283.457	70.8642	931.6	31786.2	1589.31	79.4655	26.2236	2.7023	85	415.381	1.08848	58.1533	14.5383	310.25	13247.7	35.3271	1.76636	0.582898	24.9415	85	1079.54	1.12824	1079.54	269.885		310.25	2823.28	5.64655	0.282328	0.542567		85	355.287	26.2236	13.5484
86	3608.16	1.10853	288.652	72.1631	942.56	32160.1	1608.01	80.4004	26.5321	2.71984	86	422.987	1.10841	59.2182	14.8045	313.9	13403.5	35.7427	1.78714	0.589755	25.1029	86	1107.18	1.15712	1107.18	276.795		313.9	2856.49	5.71298	0.285649	0.636831		86	363.762	26.5321	13.7103
87	3676.34	1.12948	294.107	73.5268	953.52	32534.1	1626.71	81.3353	26.8406	2.73938	87	430.972	1.12933	60.3361	15.084	317.55	13559.4	36.1584	1.80792	0.596613	25.2828	87	1136.2	1.18745	1136.2	284.049		317.55	2889.7	5.77941	0.28897	0.732191		87	372.66	26.8406	13.8842
88	3748.26	1.15157	299.86	74.9651	964.48	32908.1	1645.4	82.2701	27.1491	2.76123	88	439.394	1.1514	61.5152	15.3788	321.2	13715.2	36.574	1.8287	0.603471	25.4839	88	1166.8	1.21944	1166.8	291.701		321.2	2922.92	5.84584	0.292292	0.828648		88	382.045	27.1491	14.0721
89	3824.53	1.17501	305.963	76.4906	975.44	33282	1664.1	83.205	27.4577	2.78577	89	448.327	1.17481	62.7658	15.6915	324.85	13871.1	36.9896	1.84948	0.610328	25.7099	89	1199.27	1.25337	1199.27	299.817		324.85	2956.14	5.91227	0.295614	0.9262		89	391.999	27.4577	14.2765
90	3905.96	1.20002	312.477	78.1192	986.4	33656	1682.8	84.1399	27.7662	2.81347	90	457.864	1.1998	64.1009	16.0252	328.5	14027	37.4052	1.87026	0.617186	25.965	90	1233.92	1.28959	1233.92	308.481		328.5	2989.35	5.9787	0.298935	1.02485		90	402.625	27.7662	14.5006
91	3993.58	1.22694	319.486	79.8716	997.36	34029.9	1701.5	85.0748	28.0747	2.84497	91	468.125	1.22669	65.5375	16.3844	332.15	14182.8	37.8208	1.89104	0.624043	26.2552	91	1271.21	1.32856	1271.21	317.803		332.15	3022.57	6.04513	0.302257	1.12459		91	414.059	28.0747	14.7485
92	4088.76	1.25619	327.101	81.7752	1008.32	34403.9	1720.19	86.0097	28.3832	2.88111	92	479.272	1.2559	67.0981	16.7745	335.8	14338.7	38.2364	1.91182	0.630901	26.5882	92	1311.72	1.37089	1311.72	327.93		335.8	3055.78	6.11156	0.305578	1.22543		92	426.48	28.3832	15.0258
93	4193.42	1.28834	335.474	83.8684	1019.28	34777.8	1738.89	86.9446	28.6917	2.92309	93	491.529	1.28802	68.814	17.2035	339.45	14494.5	38.652	1.9326	0.637759	26.9749	93	1356.26	1.41744	1356.26	339.066		339.45	3089	6.17799	0.3089	1.32737		93	440.138	28.6917	15.3402
94	4310.31	1.32425	344.825	86.2061	1030.24	35151.8	1757.59	87.8795	29.0002	2.9726	94	505.218	1.32389	70.7305	17.6826	343.1	14650.4	39.0677	1.95338	0.644616	27.4312	94	1406.01	1.46943	1406.01	351.503		343.1	3122.21	6.24442	0.312221	1.4304		94	455.391	29.0002	15.703
95	4443.62	1.36521	355.489	88.8724	1041.2	35525.7	1776.29	88.8144	29.3087	3.03228	95	520.83	1.3648	72.9162	18.229	346.75	14806.2	39.4833	1.97416	0.651474	27.9812	95	1462.75	1.52873	1462.75	365.687		346.75	3155.42	6.31085	0.315543	1.53453		95	472.788	29.3087	16.1313
96	4600.24	1.41333	368.019	92.0048	1052.16	35899.7	1794.98	89.7492	29.6173	3.10646	96	539.172	1.41286	75.4841	18.871	350.4	14962.1	39.8989	1.99494	0.658332	28.6649	96	1529.4	1.59839	1529.4	382.351		350.4	3188.64	6.37728	0.318864	1.63976		96	493.227	29.6173	16.6534
97	4792.79	1.47248	383.423	95.8558	1063.12	36273.7	1813.68	90.6841	29.9258	3.20312	97	561.722	1.47195	78.6411	19.6603	354.05	15117.9	40.3145	2.01572	0.665189	29.5559	97	1611.35	1.68404	1611.35	402.838		354.05	3221.86	6.44371	0.322186	1.74608		97	518.354	29.9258	17.3213
98	5048.75	1.55112	403.9	100.975	1074.08	36647.6	1832.38	91.619	30.2343	3.33975	98	591.698	1.5505	82.8377	20.7094	357.7	15273.8	40.7301	2.03651	0.672047	30.8155	98	1720.29	1.79789	1720.29	430.071		357.7	3255.07	6.51014	0.325507	1.8535		98	551.756	30.2343	18.2493
99	5452.17	1.67506	436.174	109.043	1085.04	37021.6	1851.08	92.5539	30.5428	3.57019	99	638.944	1.67431	89.4522	22.363	361.35	15429.6	41.1457	2.05729	0.678904	32.9399	99	1891.98	1.97733	1891.98	472.995		361.35	3288.28	6.57657	0.328828	1.96201		99	604.401	30.5428	19.7887
Moristo Amoxicillin											Moristo Gentamycin											Moristo Ceftriaxone												Total Costs for All Drugs per Life Saved
80	635.617	1	50.8494	12.7123	876.8	6269.12	313.456	15.6728	5.17202	2.45791	80	316.418	1	44.2985	11.0746	292	9782	26.0853	1.30427	0.430408	25.7305	80	212.754	1	212.754	53.1884		292	721.24	1.44248	0.072124	0.0238009		80	76.9753	5.17202	14.883
81	646.608	1.01729	51.7286	12.9322	887.76	6347.48	317.374	15.8687	5.23667	2.46954	81	321.543	1.0162	45.0161	11.254	295.65	9904.28	26.4114	1.32057	0.435788	25.8245	81	216.592	1.01804	216.592	54.1481		295.65	730.256	1.46051	0.0730256	0.0240984		81	78.3343	5.23667	14.9588
82	657.96	1.03515	52.6368	13.1592	898.72	6425.85	321.292	16.0646	5.30132	2.48225	82	326.838	1.03293	45.7573	11.4393	299.3	10026.5	26.7375	1.33687	0.441168	25.9296	82	220.558	1.03668	220.558	55.1394		299.3	739.271	1.47854	0.0739271	0.0243959		82	79.7379	5.30132	15.0411
83	669.716	1.05365	53.5772	13.3943	909.68	6504.21	325.211	16.2605	5.36597	2.49616	83	332.32	1.05026	46.5248	11.6312	302.95	10148.8	27.0635	1.35318	0.446548	26.0469	83	224.664	1.05598	224.664	56.1659		302.95	748.287	1.49657	0.0748287	0.0246935		83	81.1914	5.36597	15.1308
84	681.923	1.07285	54.5539	13.6385	920.64	6582.58	329.129	16.4564	5.43063	2.5114	84	338.013	1.06825	47.3218	11.8305	306.6	10271.1	27.3896	1.36948	0.451928	26.1777	84	228.928	1.07602	228.928	57.2319		306.6	757.302	1.5146	0.0757302	0.024991		84	82.7009	5.43063	15.2286
85	694.641	1.09286	55.5713	13.8928	931.6	6660.94	333.047	16.6524	5.49528	2.52814	85	343.944	1.08699	48.1522	12.038	310.25	10393.4	27.7157	1.38578	0.457309	26.3237	85	233.37	1.0969	233.37	58.3425		310.25	766.318	1.53264	0.0766318	0.0252885		85	84.2733	5.49528	15.3356
86	707.937	1.11378	56.635	14.1587	942.56	6739.3	336.965	16.8483	5.55993	2.54657	86	350.145	1.10659	49.0203	12.2551	313.9	10515.6	28.0417	1.40209	0.462689	26.4867	86	238.014	1.11873	238.014	59.5035		313.9	775.333	1.55067	0.0775333	0.025586		86	85.9174	5.55993	15.453
87	721.896	1.13574	57.7517	14.4379	953.52	6817.67	340.883	17.0442	5.62458	2.56694	87	356.655	1.12716	49.9317	12.4829	317.55	10637.9	28.3678	1.41839	0.468069	26.669	87	242.89	1.14165	242.89	60.7224		317.55	784.349	1.5687	0.0784349	0.0258835		87	87.6433	5.62458	15.5822
88	736.619	1.1589	58.9296	14.7324	964.48	6896.03	344.802	17.2401	5.68923	2.58952	88	363.521	1.14886	50.893	12.7232	321.2	10760.2	28.6939	1.43469	0.473449	26.8735	88	248.032	1.16582	248.032	62.0081		321.2	793.364	1.58673	0.0793364	0.026181		88	89.4638	5.68923	15.7251
89	752.235	1.18347	60.1788	15.0447	975.44	6974.4	348.72	17.436	5.75388	2.61471	89	370.804	1.17188	51.9125	12.9781	324.85	10882.5	29.0199	1.451	0.478829	27.1039	89	253.487	1.19146	253.487	63.3717		324.85	802.38	1.60476	0.080238	0.0264785		89	91.3946	5.75388	15.884
90	768.906	1.2097	61.5125	15.3781	986.4	7052.76	352.638	17.6319	5.81853	2.64296	90	378.578	1.19645	53.001	13.2502	328.5	11004.8	29.346	1.4673	0.484209	27.3647	90	259.31	1.21883	259.31	64.8275		328.5	811.395	1.62279	0.0811395	0.026776		90	93.4558	5.81853	16.0618
91	786.843	1.23792	62.9475	15.7369	997.36	7131.12	356.556	17.8278	5.88318	2.67489	91	386.944	1.22289	54.1721	13.543	332.15	11127	29.6721	1.4836	0.489589	27.662	91	265.575	1.24828	265.575	66.3938		332.15	820.411	1.64082	0.0820411	0.0270735		91	95.6737	5.88318	16.2622
92	806.33	1.26858	64.5064	16.1266	1008.32	7209.49	360.474	18.0237	5.94783	2.71134	92	396.031	1.25161	55.4444	13.8611	335.8	11249.3	29.9981	1.49991	0.494969	28.004	92	272.382	1.28027	272.382	68.0954		335.8	829.426	1.65885	0.0829426	0.0273711		92	98.0831	5.94783	16.4906
93	827.756	1.30229	66.2205	16.5551	1019.28	7287.85	364.393	18.2196	6.01248	2.75346	93	406.024	1.28319	56.8433	14.2108	339.45	11371.6	30.3242	1.51621	0.500349	28.4018	93	279.866	1.31545	279.866	69.9664		339.45	838.442	1.67688	0.0838442	0.0276686		93	100.732	6.01248	16.7539
94	851.686	1.33994	68.1349	17.0337	1030.24	7366.22	368.311	18.4155	6.07713	2.80292	94	417.184	1.31846	58.4057	14.6014	343.1	11493.8	30.6503	1.53251	0.505729	28.872	94	288.224	1.35473	288.224	72.056		343.1	847.457	1.69491	0.0847457	0.0279661		94	103.691	6.07713	17.0625
95	878.978	1.38287	70.3183	17.5796	1041.2	7444.58	372.229	18.6115	6.14178	2.86229	95	429.912	1.35868	60.1876	15.0469	346.75	11616.1	30.9763	1.54882	0.511109	29.4397	95	297.757	1.39954	297.757	74.4392		346.75	856.473	1.71295	0.0856473	0.0282636		95	107.066	6.14178	17.4324
96	911.043	1.43332	72.8835	18.2209	1052.16	7522.94	376.147	18.8074	6.20643	2.93581	96	444.865	1.40594	62.2812	15.5703	350.4	11738.4	31.3024	1.56512	0.51649	30.1464	96	308.957	1.45218	308.957	77.2392		350.4	865.488	1.73098	0.0865488	0.0285611		96	111.03	6.20643	17.8896
97	950.463	1.49534	76.037	19.0093	1063.12	7601.31	380.065	19.0033	6.27108	3.03126	97	463.249	1.46404	64.8549	16.2137	354.05	11860.7	31.6285	1.58142	0.52187	31.0685	97	322.726	1.5169	322.726	80.6814		354.05	874.504	1.74901	0.0874504	0.0288586		97	115.904	6.27108	18.4824
98	1002.86	1.57778	80.2292	20.0573	1074.08	7679.67	383.984	19.1992	6.33573	3.16574	98	487.687	1.54127	68.2762	17.069	357.7	11982.9	31.9545	1.59773	0.52725	32.3737	98	341.029	1.60293	341.029	85.2572		357.7	883.519	1.76704	0.0883519	0.0291561		98	122.384	6.33573	19.3164
99	1085.46	1.70772	86.8365	21.7091	1085.04	7758.04	387.902	19.3951	6.40038	3.39185	99	526.204	1.663	73.6686	18.4171	361.35	12105.2	32.2806	1.61403	0.53263	34.5778	99	369.877	1.73852	369.877	92.4693		361.35	892.535	1.78507	0.0892535	0.0294536		99	132.596	6.40038	20.7168
Achamo Amoxicillin											Achamo Gentamycin											Achamo Ceftriaxone												Total Costs for All Drugs per Life Saved
80	3772.32	1	301.786	75.4464	876.8	33441.2	1672.06	83.6029	27.589	2.73466	80	510.899	1	71.5259	17.8815	292	14687.6	39.1669	0.391669	0.129251	138.347	80	280.837	1	280.837	70.2092		292	1570.96	3.14192	0.0314192	0.0103683		80	163.537	27.589	5.92763
81	3834.7	1.01654	306.776	76.694	887.76	33859.2	1692.96	84.6479	27.9338	2.74556	81	519.065	1.01598	72.6692	18.1673	295.65	14871.2	39.6565	0.396565	0.130867	138.823	81	286.902	1.0216	286.902	71.7254		295.65	1590.6	3.18119	0.0318119	0.0104979		81	166.587	27.9338	5.96362
82	3899.14	1.03362	311.931	77.9827	898.72	34277.2	1713.86	85.693	28.2787	2.75765	82	527.5	1.03249	73.85	18.4625	299.3	15054.8	40.1461	0.401461	0.132482	139.358	82	293.166	1.0439	293.166	73.2915		299.3	1610.23	3.22047	0.0322047	0.0106275		82	169.737	28.2787	6.00229
83	3965.86	1.05131	317.269	79.3172	909.68	34695.2	1734.76	86.738	28.6235	2.77105	83	536.235	1.04959	75.0729	18.7682	302.95	15238.4	40.6357	0.406357	0.134098	139.959	83	299.653	1.067	299.653	74.9133		302.95	1629.87	3.25974	0.0325974	0.0107571		83	172.999	28.6235	6.04393
84	4035.15	1.06967	322.812	80.703	920.64	35113.2	1755.66	87.783	28.9684	2.7859	84	545.305	1.06734	76.3427	19.0857	306.6	15422	41.1253	0.411253	0.135713	140.632	84	306.39	1.09099	306.39	76.5974		306.6	1649.51	3.29902	0.0329902	0.0108868		84	176.386	28.9684	6.08891
85	4107.33	1.08881	328.587	82.1467	931.6	35531.2	1776.56	88.8281	29.3133	2.80237	85	554.755	1.08584	77.6656	19.4164	310.25	15605.6	41.6149	0.416149	0.137329	141.386	85	313.408	1.11598	313.408	78.3519		310.25	1669.14	3.33829	0.0333829	0.0110164		85	179.915	29.3133	6.13767
86	4182.8	1.10881	334.624	83.6561	942.56	35949.2	1797.46	89.8731	29.6581	2.82068	86	564.634	1.10518	79.0488	19.7622	313.9	15789.2	42.1045	0.421045	0.138945	142.231	86	320.745	1.1421	320.745	80.1863		313.9	1688.78	3.37756	0.0337756	0.011146		86	183.605	29.6581	6.1907
87	4262.03	1.12982	340.963	85.2407	953.52	36367.3	1818.36	90.9181	30.003	2.84107	87	575.005	1.12548	80.5008	20.1252	317.55	15972.8	42.594	0.42594	0.14056	143.178	87	328.448	1.16953	328.448	82.112		317.55	1708.42	3.41684	0.0341684	0.0112756		87	187.478	30.003	6.24864
88	4345.6	1.15197	347.648	86.912	964.48	36785.3	1839.26	91.9632	30.3478	2.86386	88	585.945	1.14689	82.0323	20.5081	321.2	16156.4	43.0836	0.430836	0.142176	144.244	88	336.573	1.19846	336.573	84.1432		321.2	1728.06	3.45611	0.0345611	0.0114052		88	191.563	30.3478	6.31225
89	4434.24	1.17547	354.739	88.6847	975.44	37203.3	1860.16	93.0082	30.6927	2.88944	89	597.548	1.1696	83.6567	20.9142	324.85	16340	43.5732	0.435732	0.143792	145.448	89	345.19	1.22915	345.19	86.2975		324.85	1747.69	3.49539	0.0349539	0.0115348		89	195.896	30.6927	6.38251
90	4528.86	1.20055	362.309	90.5772	986.4	37621.3	1881.06	94.0532	31.0376	2.91831	90	609.934	1.19384	85.3908	21.3477	328.5	16523.5	44.0628	0.440628	0.145407	146.813	90	354.389	1.2619	354.389	88.5973		328.5	1767.33	3.53466	0.0353466	0.0116644		90	200.522	31.0376	6.46063
91	4630.67	1.22754	370.454	92.6134	997.36	38039.3	1901.97	95.0983	31.3824	2.95112	91	623.262	1.21993	87.2567	21.8142	332.15	16707.1	44.5524	0.445524	0.147023	148.373	91	364.288	1.29715	364.288	91.0719		332.15	1786.97	3.57393	0.0357393	0.011794		91	205.499	31.3824	6.54823
92	4741.27	1.25686	379.302	94.8255	1008.32	38457.3	1922.87	96.1433	31.7273	2.98877	92	637.741	1.24827	89.2837	22.3209	335.8	16890.7	45.042	0.45042	0.148639	150.169	92	375.041	1.33544	375.041	93.7602		335.8	1806.6	3.61321	0.0361321	0.0119236		92	210.907	31.7273	6.64748
93	4862.89	1.2891	389.031	97.2578	1019.28	38875.3	1943.77	97.1883	32.0722	3.03247	93	653.661	1.27943	91.5125	22.8781	339.45	17074.3	45.5316	0.455316	0.150254	152.263	93	386.864	1.37754	386.864	96.7161		339.45	1826.24	3.65248	0.0365248	0.0120532		93	216.852	32.0722	6.76138
94	4998.71	1.3251	399.897	99.9743	1030.24	39293.4	1964.67	98.2334	32.417	3.08401	94	671.441	1.31423	94.0017	23.5004	343.1	17257.9	46.0211	0.460211	0.15187	154.741	94	400.07	1.42456	400.07	100.017		343.1	1845.88	3.69176	0.0369176	0.0121828		94	223.492	32.417	6.89428
95	5153.62	1.36617	412.29	103.072	1041.2	39711.4	1985.57	99.2784	32.7619	3.14611	95	691.719	1.35392	96.8407	24.2102	346.75	17441.5	46.5107	0.465107	0.153485	157.736	95	415.13	1.47819	415.13	103.783		346.75	1865.51	3.73103	0.0373103	0.0123124		95	231.065	32.7619	7.05287
96	5335.62	1.41441	426.85	106.712	1052.16	40129.4	2006.47	100.323	33.1067	3.22328	96	715.544	1.40056	100.176	25.044	350.4	17625.1	47.0003	0.470003	0.155101	161.469	96	432.825	1.5412	432.825	108.206		350.4	1885.15	3.7703	0.037703	0.012442		96	239.963	33.1067	7.24815
97	5559.36	1.47373	444.749	111.187	1063.12	40547.4	2027.37	101.368	33.4516	3.32382	97	744.833	1.45789	104.277	26.0692	354.05	17808.7	47.4899	0.474899	0.156717	166.346	97	454.577	1.61865	454.577	113.644		354.05	1904.79	3.80958	0.0380958	0.0125716		97	250.901	33.4516	7.50041
98	5856.79	1.55257	468.543	117.136	1074.08	40965.4	2048.27	102.414	33.7965	3.46592	98	783.768	1.53409	109.728	27.4319	357.7	17992.3	47.9795	0.479795	0.158332	173.255	98	483.494	1.72162	483.494	120.874		357.7	1924.43	3.84885	0.0384885	0.0127012		98	265.441	33.7965	7.85411
99	6325.57	1.67684	506.046	126.511	1085.04	41383.4	2069.17	103.459	34.1413	3.70552	99	845.134	1.65421	118.319	29.5797	361.35	18175.9	48.4691	0.484691	0.159948	184.933	99	529.07	1.88391	529.07	132.268		361.35	1944.06	3.88813	0.0388813	0.0128308		99	288.359	34.1413	8.44603

## Sheet: E - Sensitivity Parameters
Costs - Sensitivity Analysis		In use	Low	source	Middle	soruce	High
Cost of 1 250 Mg tablet of Amoxicillin	usd	0.08	0.03	HP02-2021AI-CPA-Add-28-29-effective-8-June-2023.pdf (health.gov.za)	0.08	unicef / https://www.epharmacyke.com/product/amoxil-250mg-amoxicillin-250mg-10caps/	0.2
Cost of 1 mg of Gentamycin	usd	0.14	0.00459	unicef	0.04	hubpharmafrica.com/product/gentalek-injection-80mg-2ml-50amps-gentamicin/	0.14
Cost of 1 g of Ceftriaxone	usd	1	0.78	unicef	1		2.32
Cost of storing inventory	percent	0.25	0.1		0.25		0.4
lead time	Months	3	1		3		6
Standard Deviation of Lead time	Months	1.5	0.5		1.5		3
Untreated Peumonia case fataliity	%	0.05	0.1	Case Fatality Proportions and Predictive Factors for Mortality among Children Hospitalized with Severe Pneumonia in a Rural Developing Country Setting | Journal of Tropical Pediatrics | Oxford Academic (oup.com)/https://link.springer.com/article/10.1186/1741-7015-10-14	0.05		0.01
Treatment Success Rate (avoided mortality)	%	0.33	0.7	The effect of case management on	0.5	: Thwing, J. et al, BMC 2011, April 13; HAI Price Tracking Survey 2011; Sazawal, S., et al. Lancet Infect. Dis. 2003. 3:547–556. Marsh D.R., et. al. Bull World Health Organ. 2008 May; 86(5): 381-389; www.zinctaskforce.org; UNICEF survey among dispersible amoxicillin suppliers; UNICEF draft presentation on dispersible amoxicillin landscape; 27 February 2012. Amoxicillin price: 2010 UNICEF Supply D…	0.33

## Sheet: Fonko Raw Data
BB: Beginning balance	Name of Health Center: Fonko Health center		Catchment Population:	29676
DOS: Days of stock out
Exp: Expired amount
EB: Ending balance	Year |Established: 1989		Number of Health post:	6
	Amoxicillin dispersible tablets 250 mg (In tablets)	Gentamicin Injection,10 mg/mL	Gentamicin Injection, 20 mg/mL	Ceftriaxone 1g
SKU Price	1.9	20		50
JULY, 2013- consumption	1000	70	14	65
BB	2500	500	45	65
Received	0	0	0	0
DOS	0	0	0	8
Exp	0	0	0	0
AUGUST, 2013- consumption	800	60	10	0
Received	0	0	0	0
DOS	0	0	0	30
Exp	0	0	0	0
SEPTEMBER, 2014- consumption	1000	73	12	0
Received	3000	0	0	0
DOS	0	0	0	30
Exp	0	0	0	0
OCTOBER, 2014- consumption	800	56	9	0
Received	0	200	0	0
DOS	0	0	5	30
Exp	0	0	0	0
NOVEMBER, 2014- consumption	600	80	0	80
Received	0	0	0	400
DOS	0	0	30	0
Exp	0	0	0	0
DECEMBER, 2014- consumption	1400	67	13	105
Received	2500	0	100	0
DOS	0	0	0	0
Exp	0	0	0	0
JANUARY, 2014- consumption	1000	70	16	117
Received	0	150	0	0
DOS	0	0	0	0
Exp	0	0	0	0
FEBRUARY, 2014- consumption	900	69	13	98
Received	0	0	0	0
DOS	0	0	0	6
Exp	0	0	0	0
MARCH, 2014- consumption	1400	84	18	120
Received	3500	0	0	650
DOS	0	0	0	0
Exp	0	0	0	0
APRIL, 2014- consumption	1200	50	12	95
Received	0	0	0	0
DOS	0	0	0	0
Exp	0	0	0	0
MAY, 2014- consumption	1400	65	10	119
Received	0	0	0	0
DOS	5	0	0	0
Exp	0	0	0	0
JUNE, 2014- consumption	1300	60	9	128
EB	1700	146	59	188
Received	3000	100	50	0
DOS	0	0	0	0
Exp	0	0	0	0
JULY, 2014- consumption	800	86	14	134
BB	1700	146	59	188
Received	0	0	0	0
DOS	0	0	0	0
Exp	0	0	0	0
AUGUST, 2014- consumption	700	60	15	54
Received	0
DOS	0	5	0	17
Exp	0	0	0	0
SEPTEMBER, 2015- consumption	1600	54	17	0
Received	2500	200	0	0
DOS	0	0	0	30
Exp	0	0	0	0
OCTOBER, 2015- consumption	1100	60	10	0
Received	0	0	0	0
DOS	16	0	0	30
Exp	0	0	0	0
NOVEMBER, 2015- consumption	1450	58	3	0
Received	2800	0	0	0
DOS	0	0	25	30
Exp	0	0	0	0
DECEMBER, 2015- consumption	1200	60	0	0
Received	0	150	0	0
DOS	0	0	30	30
Exp	0	0	0	0
JANUARY, 2015- consumption	150	50	0	86
Received	0	0	0	450
DOS	25	0	30	0
Exp	0	0	0	0
FEBRUARY, 2015- consumption	1500	56	8	104
Received	4500	100	100	0
DOS	0	0	0	0
Exp	0	0	0	0
MARCH, 2015- consumption	1670	62	12	95
Received	0	0	0	0
DOS	0	0	0	0
Exp	0	0	0	0
APRIL, 2015- consumption	1330	50	15	110
Received	0	0	0	0
DOS	10	6	0	0
Exp	0	0	0	0
MAY, 2015- consumption	1400	70	19	55
Received	3000	250	0	0
DOS	0	0	0	16
Exp	0	0	0	0
JUNE, 2015- consumption	1250	76	17	0
EB	350	104	29	0
Received	0	0	0	0
DOS	0	0	0	30
Exp	0	0	0	0
JULY, 2015- consumption	350	68	16	0
BB	350	104	29	0
Received	0	0	0	0
DOS	17	0	0	30
Exp	0	0	0	0
AUGUST, 2015- consumption	1300	80	13	0
Received	4000	300	0	0
DOS	0	0	7	30
Exp	0	0	0	0
SEPTEMBER, 2016- consumption	1460	69	0	0
Received	0	0	0	0
DOS	0	0	30	30
Exp	0	0	0	0
OCTOBER, 2016- consumption	1100	54	0	0
Received	0	0	0	0
DOS	0	0	30	30
Exp	0	0	0	0
NOVEMBER, 2016-consumption	1500	59	11	120
Received	5000	100	50	400
DOS	0	0	0	0
Exp	0	0	0	0
DECEMBER, 2016- consumption	1280	60	13	115
Received	0	0	0	0
DOS	0	0	0	0
Exp	0	0	0	0
JANUARY, 2016- consumption	1440	65	9	97
Received	0	0	0	0
DOS	0	0	0	0
Exp	0	0	0	0
FEBRUARY, 2016- consumption	1680	60	14	0
Received	3500	250	0	0
DOS	0	0	0	30
Exp	0	0	0	0
MARCH, 2016- consumption	1250	72	3	118
Received	0	0	0	200
DOS	0	0	21	0
Exp	0	0	0	0
APRIL, 2016- consumption	1340	65	0	118
Received	0	0	0	0
DOS	0	0	30	4
Exp	0	0	0	0
MAY, 2016- consumption	1500	78	16	0
Received	4500	100	50	30
DOS	0	0	0	0
Exp	0	0	0	0
JUNE, 2016- consumption	1700	83	21	0
Received	0	0	0	0
EB	1450	41	13	0
DOS	0	0	0	30
Exp	0	0	0	0

## Sheet: Shrumo Raw Data
BB: Beginning balance	Name of Health Center: Shurmo Health center		Catchment Population:	24542
DOS: Days of stock out
Exp: Expired amount
EB: Ending balance	Year |Established: 2000		Number of Health post:	4
	Amoxicillin dispersible tablets 250 mg (In tablets)	Gentamicin Injection,10 mg/mL	Gentamicin Injection, 20 mg/mL	Ceftriaxone 1g
SKU Price	1.9	10	16	60
JULY, 2013- consumption	452	12	20	71
BB	2000	55	148	11
Received	0	0	0	450
DOS	0	0	0	0
Exp	0	0	0	0
AUGUST, 2013- consumption	476	10	10	110
Received	0	0	0	91
DOS	0	0	0	0
Exp	0	0	0	0
SEPTEMBER, 2014- consumption	422	16	14	120
Received	0	0	0	0
DOS	0	0	0	0
Exp	0	0	0	0
OCTOBER, 2014- consumption	506	10	18	132
Received	0	100	0	0
DOS	0	0	0	0
Exp	0	0	0	0
NOVEMBER, 2014- consumption	492	14	10	100
Received	1000	0	0	600
DOS	0	0	0	0
Exp	0	0	0	0
DECEMBER, 2014- consumption	422	12	14	164
Received	0	0	0	0
DOS	0	0	0	0
Exp	0	0	0	0
JANUARY, 2014- consumption	520	24	24	127
Received	1000	0	0	0
DOS	0	0	0	0
Exp	0	0	0	0
FEBRUARY, 2014- consumption	408	20	16	204
Received	0	0	0	0
DOS	0	0	0	0
Exp	0	0	0	0
MARCH, 2014- consumption	514	18	18	170
Received	3000	50	100	560
DOS	0	0	0	0
Exp	0	0	0	0
APRIL, 2014- consumption	452	16	16	130
Received	0	0	0	0
DOS	0	0	0	0
Exp	0	0	0	0
MAY, 2014- consumption	540	26	8	156
Received	0	0	0	1000
DOS	0	0	0	0
Exp	0	0	0	0
JUNE, 2014- consumption	462	16	12	182
EB	1334	11	68	1046
Received	0	0	0	0
DOS	0	0	0	0
Exp	0	0	0	0
JULY, 2014- consumption		10	19	240
BB	1334	11	68	1040
Received	0	0	0	0
DOS	0	0	0	0
Exp	0	0	0	0
AUGUST, 2014- consumption	460	1	18	190
Received	0	0	0	0
DOS	0	29	0	0
Exp	0	0	0	0
SEPTEMBER, 2015- consumption	502	0	20	146
Received	0	0	0	0
DOS	0	30	0	0
Exp	0	0	0	0
OCTOBER, 2015- consumption	372	0	11	284
Received	0	0	0	0
DOS	9	30	13	0
Exp	0	0	0	0
NOVEMBER, 2015- consumption	534	20	22	160
Received	2500	100	200	400
DOS	0	0	0
Exp	0	0	0	0
DECEMBER, 2015- consumption	492	14	18	148
Received	0	0	0	0
DOS	0	0	0	0
Exp	0	0	0	0
JANUARY, 2015- consumption	506	26	24	170
Received	0	0	0	0
DOS	0	0	0	0
Exp	0	0	0	0
FEBRUARY, 2015- consumption	436	16	14	134
Received	0	0	0	750
DOS	0	0	0	0
Exp	0	0	0	0
MARCH, 2015- consumption	408	12	8	158
Received	0	0	0	0
DOS	0	0	0	0
Exp	0	0	0	0
APRIL, 2015- consumption	124	8	14	206
Received	0	0	0	0
DOS	15	0	0	0
Exp	0	0	0	0
MAY, 2015- consumption	450	12	16	165
Received	3000	1000	0	300
DOS	0	0	0	0
Exp	0	0	0	0
JUNE, 2015- consumption	478	18	16	180
EB	2072	74	68	315
Received	0	0	0	0
DOS	0	0	0	0
Exp	0	0	0	0
JULY, 2015- consumption	492	20	10	129
BB	2072	74	28	315
Received	0	0	0	0
DOS	0	0	0	0
Exp	0	0	0	0
AUGUST, 2015- consumption	502	10	18	150
Received	0	0	0	800
DOS	0	0	0	0
Exp	0	0	0	0
SEPTEMBER, 2016- consumption	478	14	14	188
Received	0	0	0	0
DOS	0	0	0	0
Exp	0	0	0	0
OCTOBER, 2016- consumption	520	20	12	210
Received	0	0	0	0
DOS	0	0	0	0
Exp	0	0	0	0
NOVEMBER, 2016-consumption	534	10	14	260
Received	3050	0	0	0
DOS	0	10	7	0
Exp	0	0	0	0
DECEMBER, 2016- consumption	544	16	18	160
Received	0	150	200	500
DOS	0	0	0	0
Exp	0	0	0	0
JANUARY, 2016- consumption	492	8	20	142
Received	0	0	0	0
DOS	0	0	0	0
Exp	0	0	0	0
FEBRUARY, 2016- consumption	502	16	16	200
Received	0	0	0	0
DOS	0	0	0	0
Exp	0	0	0	0
MARCH, 2016- consumption	436	14	12	149
Received	0	0	0	0
DOS	0	0	0	0
Exp		6	0	0
APRIL, 2016- consumption	520	10	18	160
Received	2300	0	0	1200
DOS	0	0	0	0
Exp	0	0	0	0
MAY, 2016- consumption	548	18	15	250
Received	0	0	0	0
DOS	0	0	0	0
Exp	0	0	0	0
JUNE, 2016- consumption	502	12	25	240
Received	0	0	0	0
EB	1302	0	76	577
DOS	0	8	0	0
Exp	0	0	0	0

## Sheet: Belesa Raw Data
BB: Beginning balance	Name of Health Center: Belesa Health center		Catchment Population:	26864
DOS: Days of stock out
Exp: Expired amount
EB: Ending balance	Year |Established: 1954		Number of Health post:	6
	Amoxicillin dispersible tablets 250 mg (In tablets)	Gentamicin Injection,10 mg/mL	Gentamicin Injection, 20 mg/mL	Ceftriaxone 1g
SKU Price	1.9	20	17	45
JULY, 2013- consumption	600	90	24	0
BB	1200	270	106	0
Received	0	0	0	0
DOS	0	0	0	30
Exp	0	0	0	0
AUGUST, 2013- consumption	600	108	18	0
Received	0	0	0
DOS	9	0	0	0
Exp	0	0	0	30
SEPTEMBER, 2014- consumption	0	12	14	190
Received	0	0	0	700
DOS	30	21	0	0
Exp	0	0	0	0
OCTOBER, 2014- consumption	1000	80	17	240
Received	2600	350	0	0
DOS	0	0	0	0
Exp	0	0	0	0
NOVEMBER, 2014- consumption	950	95	16	270
Received	0	0	100	0
DOS	0	0	0	6
Exp	0	0	0	0
DECEMBER, 2014- consumption	650	105	21	0
Received	0	0	0	0
DOS	7	0	0	30
Exp	0	0	0	0
JANUARY, 2014- consumption	0	70	20	0
Received	0	0	0	0
DOS	30	6	0	30
Exp	0	0	0	0
FEBRUARY, 2014- consumption	1100	0	25	0
Received	3000	0	0	0
DOS	0	30	0	30
Exp	0	0	0	0
MARCH, 2014- consumption	850	105	18	210
Received	0	400	0	1080
DOS	0	0	0	0
Exp	0	0	0	0
APRIL, 2014- consumption	840	120	19	176
Received	0	0	0	0
DOS	0	0	0	0
Exp	0	0	0	0
MAY, 2014- consumption	900	115	14	200
Received	2800	0	0	0
DOS	0	0	5	0
Exp	0	0	0	0
JUNE, 2014- consumption	1250	60	0	230
EB	860	0	0	184
Received	0	0	0	0
DOS	0	17	30	0
Exp	0	0	0	0
JULY, 2014- consumption	860	0	0	184
BB	860	0	0	184
Received	0	0	0	0
DOS	12	30	30	13
Exp	0	0	0	0
AUGUST, 2014- consumption	1600	0	20	0
Received	4000	0	100	0
DOS	0	30	0	30
Exp	0	0	0	0
SEPTEMBER, 2015- consumption	1000	90	19	0
Received	0	300	0	0
DOS	0	0	0	30
Exp	0	0	0	0
OCTOBER, 2015- consumption	900	65	24	250
Received	0	0	0	650
DOS	0	0	0	0
Exp	0	0	0	0
NOVEMBER, 2015- consumption	500	79	17	190
Received	0	0	0	0
DOS	12	0	0	0
Exp	0	0	0	0
DECEMBER, 2015- consumption	900	70	16	200
Received	3500	250	0	600
DOS	0	0	0	0
Exp	0	0	0	0
JANUARY, 2015- consumption	1060	84	4	145
Received	0	0	0	0
DOS	0	0	24	0
Exp	0	0	0	0
FEBRUARY, 2015- consumption	1000	67	0	235
Received	0	0	0	0
DOS	0	0	30	0
Exp	0	0	0	0
MARCH, 2015- consumption	940	80	0	196
Received	3000	0	0	0
DOS	0	0	30	0
Exp	0	0	0	0
APRIL, 2015- consumption	1200	15	21	34
Received	0	0	2000	0
DOS	0	19	0	25
Exp	0	0	0	0
MAY, 2015- consumption	800	0	30	0
Received	0	0	0	0
DOS	0	30	0	30
Exp	0	0	0	0
JUNE, 2015- consumption	600	0	23	235
EB	0	0	126	515
Received	0	0	0	750
DOS	9	30	0	0
Exp	0	0	0	0
JULY, 2015- consumption	1300	90		210
BB	0	0	1260	515
Received	3500	400	0	0
DOS	0	0	0	0
Exp	0	0	0	0
AUGUST, 2015- consumption	1250	120	34	180
Received	0	0	0	0
DOS	0	0	0	0
Exp	0	0	0	0
SEPTEMBER, 2016- consumption	950	80	26	125
Received	0	0	0	0
DOS	4	0	0	16
Exp	0	0	0	0
OCTOBER, 2016- consumption	0	63	18	0
Received	0	0	0	0
DOS	30	0	0	30
Exp	0	0	0	0
NOVEMBER, 2016-consumption	900	76	20	0
Received	4000	300	100	0
DOS	0	0	0	30
Exp	0	0	0	0
DECEMBER, 2016- consumption	1100	86	20	0
Received	0	0	0	0
DOS	0	0	0	30
Exp	0	0	0	0
JANUARY, 2016- consumption	820	90	19	2024
Received	0	0	0	800
DOS	0	0	0	0
Exp	0	0	0	0
FEBRUARY, 2016- consumption	930	95	15	174
Received	0	0	0	0
DOS	0	2	0	0
Exp	0	0	0	0
MARCH, 2016- consumption	850	90	20	200
Received	2700	350	0	0
DOS	0	0	0	0
Exp	0	0	0	0
APRIL, 2016- consumption	1000	105	23	180
Received	0	0	0	0
DOS	0	0	0	0
Exp	0	0	0	0
MAY, 2016- consumption	1500	110	27	210
Received	3000	0	0	600
DOS	0	0	0	0
Exp	0	0	0	0
JUNE, 2016- consumption	1450	45	4	250
Received	0	0	0	0
EB	1150	0	0	182
DOS	0	18	28	0
Exp	0	0	0	0

## Sheet: Moristo Raw Data
BB: Beginning balance	Name of Health Center: Moristo Health center		Catchment Population:	57317
DOS: Days of stock out
Exp: Expired amount
EB: Ending balance	Year |Established: 1997		Number of Health post:	13
	Amoxicillin dispersible tablets 250 mg (In tablets)	Gentamicin Injection,10 mg/mL	Gentamicin Injection, 20 mg/mL	Ceftriaxone 1g
SKU Price	1.72	20.4	19.3	67
JULY, 2013- consumption	320	100	21	70
BB	500	249	96	200
Received	0	0	0	0
DOS	0	0	0	0
Exp	0	0	0	0
AUGUST, 2013- consumption	180	80	19	80
Received	0	0	0	0
DOS	14	0	0	0
Exp	0	0	0	0
SEPTEMBER, 2014- consumption	300	69	24	70
Received	400	0	0	100
DOS	0	4	0	0
Exp	0	0	0	0
OCTOBER, 2014- consumption	100	50	21	95
Received	0	100	0	0
DOS	23	0	0	0
Exp	0	0	0	0
NOVEMBER, 2014- consumption	0	30	11	79
Received	0	0	0	0
DOS	30	0	9	0
Exp	0	0	0	6
DECEMBER, 2014- consumption	210	50	26	0
Received	650	100	100	22
DOS	0	0	0	0
Exp	0	0	0	0
JANUARY, 2014- consumption	190	60	18	0
Received	0	0	0	0
DOS	0	0	0	30
Exp	0	0	0	0
FEBRUARY, 2014- consumption	220	10	20	0
Received	0	0	0	0
DOS	0	20	0	0
Exp	0	0	0	30
MARCH, 2014- consumption	270	85	17	65
Received	500	200	0	150
DOS	0	0	0	0
Exp	0	0	0	0
APRIL, 2014- consumption	230	47	14	70
Received	0	0	0	0
DOS	0	0	0	0
Exp	0	0	0	0
MAY, 2014- consumption	30	63	5	90
Received	0	0	0	200
DOS	26	0	22	0
Exp	0	0	0	0
JUNE, 2014- consumption	0	60	0	75
EB	0	45	0	50
Received	30	0	30	0
DOS	0	100	0	0
Exp	0	0	0	0
JULY, 2014- consumption	0	45	0	50
BB	0	45	0	50
Received	0	0	0	0
DOS	30	12	30	8
Exp	0	0	0	0
AUGUST, 2014- consumption	200	0	13	0
Received	540	0	100	0
DOS	0	30	0	30
Exp	0	0	0	0
SEPTEMBER, 2015- consumption	180	0	16	0
Received	0	0	0	0
DOS	0	30	0	30
Exp	0	0	0	0
OCTOBER, 2015- consumption	160	64	20	65
Received	0	200	0	200
DOS	4	0	0	0
Exp	0	0	0	0
NOVEMBER, 2015- consumption	180	70	18	90
Received	650	0	0	0
DOS	0	0	0	0
Exp	0	0	0	0
DECEMBER, 2015- consumption	210	56	17	101
Received	0	0	0	150
DOS	0	0	0	0
Exp	0	0	0	0
JANUARY, 2015- consumption	190	47	20	78
Received	400	100	100	0
DOS	0	0	0	0
Exp	0	0	0	0
FEBRUARY, 2015- consumption	230	63	28	13
Received	0	0	0	0
DOS	0	2	0	19
Exp	0	0	0	0
MARCH, 2015- consumption	200	0	25	0
Received	0	0	0	0
DOS	0	30	0	30
Exp	0	0	0	0
APRIL, 2015- consumption	40	0	20	0
Received	0	0	0	0
DOS	19	30	0	30
Exp	0	0	0	0
MAY, 2015- consumption	0	50	23	0
Received	0	100	0	0
DOS	30	0	10	30
Exp	0	0	0	0
JUNE, 2015- consumption	0	50	0	60
EB	0	0	0	190
Received	0	0	0	250
DOS	30	6	30	0
Exp	0	0	0	0
JULY, 2015- consumption	250	0	25	86
BB	0	0	100	0
Received	700	0	0	0
DOS	0	30	0	0
Exp	0	0	0	0
AUGUST, 2015- consumption	300	60	26	90
Received	0	200	0	0
DOS	0	0	0	0
Exp	0	0	0	0
SEPTEMBER, 2016- consumption	280	70	23	74
Received	450	0	0	150
DOS	0	0	0	0
Exp	0	0	0	0
OCTOBER, 2016- consumption	230	56	19	80
Received	0	0	0	0
DOS	0	0	0	0
Exp	0	0	0	0
NOVEMBER, 2016-consumption	190	58	20	10
Received	0	100	100	0
DOS	9	0	0	23
Exp	0	0	0	0
DECEMBER, 2016- consumption	0	53	28	0
Received	0	0	0	0
DOS	30	0	0	30
Exp	0	0	0	0
JANUARY, 2016- consumption	170	80	20	80
Received	550	200	0	300
DOS	0	0	0	0
Exp	0	0	0	0
FEBRUARY, 2016- consumption	200	60	25	105
Received	0	0	0	0
DOS	0	0	0	0
Exp	0	0	0	0
MARCH, 2016- consumption	180	63	20	87
Received	0	0	100	0
DOS	3	7	0	0
Exp	0	0	0	0
APRIL, 2016- consumption	210	59	27	18
Received	650	100	0	0
DOS	0	0	0	24
Exp	0	0	0	0
MAY, 2016- consumption	250	41	23	100
Received	0	0	0	250
DOS	0	16	0	0
Exp	0	0	0	0
JUNE, 2016- consumption	190	59	24	98
Received	0	100	0	0
EB	0	41	24	52
DOS	0	0	0	0
Exp	0	0	0	0

## Sheet: Achamo Raw Data
BB: Beginning balance	Name of Health Center: Achamo Health center		Catchment Population:	22701
DOS: Days of stock out
Exp: Expired amount
EB: Ending balance	Year |Established: 1987		Number of Health post:	7
	Amoxicillin dispersible tablets 250 mg (In tablets)	Gentamicin Injection,10 mg/mL	Gentamicin Injection, 20 mg/mL	Ceftriaxone 1g
SKU Price	1.9	20	15	40
JULY, 2013- consumption	1500	120	20	42
BB	3200	350	200	42
Received	0	0	0	0
DOS	0	0	0	16
Exp	0	0	0	0
AUGUST, 2013- consumption	1300	140	16	0
Received	0	0	0	0
DOS	0	0	0	30
Exp	0	0	0	0
SEPTEMBER, 2014- consumption	1000	90	24	0
Received	2400	300	0	0
DOS	0	0	0	30
Exp	0	0	0	0
OCTOBER, 2014- consumption	1200	120	40	140
Received	0	0	0	400
DOS	0	0	0	0
Exp	0	0	0	0
NOVEMBER, 2014- consumption	600	87	25	165
Received	0	0	0	0
DOS	15	0	0	0
Exp	0	0	0	0
DECEMBER, 2014- consumption	1400	92	16	95
Received	2800	0	0	0
DOS	0	0	0	10
Exp	0	0	0	0
JANUARY, 2014- consumption	900	100	27	0
Received	0	250	0	0
DOS	0	0	0	30
Exp	0	0	0	0
FEBRUARY, 2014- consumption	500	96	20	185
Received	0	0	0	600
DOS	18	0	0	0
Exp	0	0	0	0
MARCH, 2014- consumption	1650	95	12	200
Received	4500	300	0	0
DOS	0	0	18	0
Exp	0	0	0	0
APRIL, 2014- consumption	850	110	18	150
Received	0	0	150	0
DOS	0	0	0	0
Exp	0	0	0	0
MAY, 2014- consumption	1100	130	24	65
Received	0	0	0	0
DOS	0	0	0	16
Exp	0	0	0	0
JUNE, 2014- consumption	1600	140	18	0
EB	1300	180	90	0
Received	2500	300	0	0
DOS	0	0	0	0
Exp	0	0	0	0
JULY, 2014- consumption	1300	125	26	0
BB	1300	180	90	0
Received	0	0	0	0
DOS	9	0	0	30
Exp	0	0	0	0
AUGUST, 2014- consumption	0	55	19	0
Received	0	0	0	0
DOS	0	18	0	30
Exp	0	0	0	0
SEPTEMBER, 2015- consumption	1250	90	17	0
Received	3000	350	0	0
DOS	0	0	0	30
Exp	0	0	0	0
OCTOBER, 2015- consumption	960	80	16	0
Received	0	0	0	0
DOS	0	0	0	30
Exp	0	0	0	0
NOVEMBER, 2015- consumption	790	100	19	0
Received	0	0	0	0
DOS	7	0	0	30
Exp	0	0	0	0
DECEMBER, 2015- consumption	900	110	20	0
Received	4500	300	200	0
DOS	0	0	0	30
Exp	0	0	0	0
JANUARY, 2015- consumption	1000	100	17	0
Received	0	0	0	0
DOS	0	0	0	30
Exp	0	0	0	0
FEBRUARY, 2015- consumption	1140	120	15	0
Received	0	0	0	0
DOS	0	0	0	30
Exp	0	0	0	0
MARCH, 2015- consumption	1100	75	19	200
Received	2000	250	0	600
DOS	0	0	0	0
Exp	0	0	0	0
APRIL, 2015- consumption	980	95	21	165
Received	0	0	0	0
DOS	0	0	0	0
Exp	0	0	0	0
MAY, 2015- consumption	1300	130	24	200
Received	0	0	0	0
DOS	0	6	0	0
Exp	0	0	0	0
JUNE, 2015- consumption	1500	150	25	35
EB	2580	250	62	0
Received	4000	400	0	0
DOS	0	0	0	21
Exp	0	0	0	0
JULY, 2015- consumption	1600	170	23	0
BB	2580	250	62	0
Received	0	0	0	0
DOS	0	0	0	30
Exp	0	0	0	0
AUGUST, 2015- consumption	980	80	20	0
Received	0	0	0	0
DOS	12	13	0	30
Exp	0	0	0	0
SEPTEMBER, 2016- consumption	1200	0	16	0
Received	2500	0	0	0
DOS	0	30	0	30
Exp	0	0	0	0
OCTOBER, 2016- consumption	970	0	17	0
Received	0	0	200	0
DOS	0	30	0	30
Exp	0	0	0	0
NOVEMBER, 2016-consumption	330	120	20	0
Received	0	450	0	0
DOS	24	0	0	30
Exp	0	0	0	0
DECEMBER, 2016- consumption	1200	90	23	0
Received	3200	0	0	0
DOS	0	0	0	30
Exp	0	0	0	0
JANUARY, 2016- consumption	1000	110	18	168
Received	0	0	0	600
DOS	0	0	0	0
Exp	0	0	0	0
FEBRUARY, 2016- consumption	890	80	19	200
Received	0	0	0	0
DOS	0	0	0	0
Exp	0	0	0	0
MARCH, 2016- consumption	110	50	20	180
Received	0	0	0	0
DOS	23	19	0	0
Exp	0	0	0	0
APRIL, 2016- consumption	0	120	24	52
Received	0	400	0	0
DOS	30	0	0	20
Exp	0	0	0	0
MAY, 2016- consumption	1400	130	30	0
Received	4200	0	0	0
DOS	0	0	0	30
Exp	0	0	0	0
JUNE, 2016- consumption	1700	135	26	0
Received	0	0	0	0
EB	1100	15	6	0
DOS	0	0	0	30
Exp	0	0	0	0

[truncated: 1 more sheets: HC info]
